# Supplementary material for: Checklist of national key protected wild plants on the Qinghai-Tibetan Plateau
Source: Biodivers Data J. 2023 May 16;11:e103289. doi: 10.3897/BDJ.11.e103289 (PMC10206527; doi:10.3897/BDJ.11.e103289)
Supplement: Supplementary material 1 — Checklist of National Key Protected Wild Plants on the Qinghai-Tibetan Plateau [file bdj-11-e103289-s001.csv]

Taxon_Local_ID	Kingdom	Phylum	Class	Order	Family	Genus	Species	Subspecies	Variety	Authorship	Conservation Status	Worldwide Distribution	County-level Distribution in Qinghai-Tibetan Plateau	Horizon	Notes
1	Plantae	Bryophyta	Bryopsida	Archidiales	Leucobryaceae	Leucobryum	juniperoideum			C.M��ller, 1845	LC	East Asia, Europe	Wenchuan
2	Plantae	Bryophyta	Sphagnopsida	Sphagnales	Sphagnaceae	Sphagnum	multifibrosum			X.J. Li & M. Zang, 1984	LC	China	Shangri-la
3	Plantae	Bryophyta	Sphagnopsida	Sphagnales	Sphagnaceae	Sphagnum	squarrosum			Crome, 1803	LC	East Asia, Europe, Oceania, North America	Dujiangyan, Tianquan, Baoxing, Gongshan, Weixi, Motuo, Bomi
4	Plantae	Bryophyta	Takakiopsida	Takakiales	Takakiaceae	Takakia	ceratophylla			(Mitt.) Grolle, 1963	VU	China, North America	Fugong, Gongshan, Deqin, Milin, Motuo
5	Plantae	Bryophyta	Takakiopsida	Takakiales	Takakiaceae	Takakia	lepidozioides			S.Hatt. & Inoue, 1958	EN	China, Japan, North America	Fugong
6	Plantae	Lycopodiophyta	Lycopodiopsida	Lycopodiales	Lycopodiaceae	Huperzia	appressa			(Desv.)??.L?ve?&?D.L?ve,1961	DD	Asia, Europe, North America	Dujiangyan, Basu, Bomi
7	Plantae	Lycopodiophyta	Lycopodiopsida	Lycopodiales	Lycopodiaceae	Huperzia	bucahwangensis			Ching, 1981	DD	China	Gongshan
8	Plantae	Lycopodiophyta	Lycopodiopsida	Lycopodiales	Lycopodiaceae	Huperzia	chinensis			Ching, 1981	NT	China	Shimian, Jinchuan, Wenxian
9	Plantae	Lycopodiophyta	Lycopodiopsida	Lycopodiales	Lycopodiaceae	Huperzia	crispata			Ching, 1981	VU	China	Shimian, Tianquan
10	Plantae	Lycopodiophyta	Lycopodiopsida	Lycopodiales	Lycopodiaceae	Huperzia	delavayi			Ching, 1981	DD	China	Gongshan, Lushui
11	Plantae	Lycopodiophyta	Lycopodiopsida	Lycopodiales	Lycopodiaceae	Huperzia	dixitiana			P.Mondal & R.K.Ghosh, 1995	DD	China	Kangding		Endemic to Qinghai-Tibetan Plateau
12	Plantae	Lycopodiophyta	Lycopodiopsida	Lycopodiales	Lycopodiaceae	Huperzia	emeiensis			Ching & H.S. Kung, 1981	DD	China	Luding
13	Plantae	Lycopodiophyta	Lycopodiopsida	Lycopodiales	Lycopodiaceae	Huperzia	herteriana			(Kumm.)T. Sen & U. Sen, 1978	DD	China, Bhutan, India, Nepal	Jinchuan, Madongkang, Luding, Wenchuan, Tianquan, Gongshan, Nielamu, Linzhi, Milin
14	Plantae	Lycopodiophyta	Lycopodiopsida	Lycopodiales	Lycopodiaceae	Huperzia	kangdingensis			Ching, 1981	DD	China	Kangding
15	Plantae	Lycopodiophyta	Lycopodiopsida	Lycopodiales	Lycopodiaceae	Huperzia	lajouensis			Ching, 1981	DD	China	Chayu		Endemic to Qinghai-Tibetan Plateau
16	Plantae	Lycopodiophyta	Lycopodiopsida	Lycopodiales	Lycopodiaceae	Huperzia	liangshanica			(H.S. Kung) Ching & H.S. Kung, 1981	DD	China	Gongshan
17	Plantae	Lycopodiophyta	Lycopodiopsida	Lycopodiales	Lycopodiaceae	Huperzia	quasipolytrichoides			(Hayata) Ching, 1981	VU	China, Japan	Gongshan
18	Plantae	Lycopodiophyta	Lycopodiopsida	Lycopodiales	Lycopodiaceae	Huperzia	rubicaulis			S.K. Wu & X. Cheng, 1985	DD	China	Gongshan		Endemic to Qinghai-Tibetan Plateau
19	Plantae	Lycopodiophyta	Lycopodiopsida	Lycopodiales	Lycopodiaceae	Huperzia	selago			(L.)Bernh.ex Schrank & Martius, 1829	LC	America, Asia, Europe, Pacific islands	Dujiangyan, Basu, Bomi, Zhouqu
20	Plantae	Lycopodiophyta	Lycopodiopsida	Lycopodiales	Lycopodiaceae	Huperzia	serrata			(Thunb.)Trevis, 1875	EN	East Asia, the Pacific, Russia, Oceania, Central America	Dujiangyan, Tianquan, Luding, Gongshan, Lushui, Fugong, Motuo, Chayu
21	Plantae	Lycopodiophyta	Lycopodiopsida	Lycopodiales	Lycopodiaceae	Huperzia	sutchueniana			(Herter)Ching, 1981	DD	China	Dujiangyan
22	Plantae	Lycopodiophyta	Lycopodiopsida	Lycopodiales	Lycopodiaceae	Huperzia	tibetica			Ching, 1981	DD	China	Gongshan		Endemic to Qinghai-Tibetan Plateau
23	Plantae	Lycopodiophyta	Lycopodiopsida	Lycopodiales	Lycopodiaceae	Phlegmariurus	cancellatus			(Spring)Ching, 1982	DD	China, India, Bhutan	Linzhi, Bomi
24	Plantae	Lycopodiophyta	Lycopodiopsida	Lycopodiales	Lycopodiaceae	Phlegmariurus	fargesii			(Herter)Ching, 1982	DD	China, Japan	Bomi
25	Plantae	Lycopodiophyta	Lycopodiopsida	Lycopodiales	Lycopodiaceae	Phlegmariurus	hamiltonii			(Spreng.) A. L?ve & D. L?ve, 1977	DD	China, India, Nepal, Bhutan, Myanmar
26	Plantae	Lycopodiophyta	Lycopodiopsida	Lycopodiales	Lycopodiaceae	Phlegmariurus	nylamensis			(Ching & S.K.Wu) H.S.Kung & Li Bing Zhang, 1999	DD	China	Motuo, Nielamu		Endemic to Qinghai-Tibetan Plateau
27	Plantae	Lycopodiophyta	Lycopodiopsida	Lycopodiales	Lycopodiaceae	Phlegmariurus	pulcherrimus			(Hook. & Grev.) ?.L?ve & D.L?ve,, 1977	DD	China, Bhutan, India	Gongshan, Lushui, Motuo
28	Plantae	Lycopodiophyta	Lycopodiopsida	Lycopodiales	Lycopodiaceae	Phlegmariurus	squarrosus			?. L?ve & D. L?ve, 1977	NT	China, India, Nepal, Myanmar, Thailand, Vietnam, Laos, Cambodia, Bangladesh, Sri Lanka, Malaysia, Philippines, Polynesia, Madagascar	Motuo
29	Plantae	Lycopodiophyta	Lycopodiopsida	Lycopodiales	Lycopodiaceae	Phlegmariurus	subulifolius			(Wall. ex Hook. & Grev.) S.R.Ghosh, 2004	DD	China, India, Nepal	Gongshan, Motuo
30	Plantae	Lycopodiophyta	Lycopodiopsida	Lycopodiales	Lycopodiaceae	Phlegmariurus	yunnanensis			Ching, 1982	DD	China	Gongshan		Endemic to Qinghai-Tibetan Plateau
31	Plantae	Lycopodiophyta	Lycopodiopsida	Isoetales	Isoetaceae	Isoetes	hypsophila			Handel-Mazz., 1923	VU	China	Jiulong, Daocheng, Yulong, Ninglang		Endemic to Qinghai-Tibetan Plateau
32	Plantae	Lycopodiophyta	Lycopodiopsida	Isoetales	Isoetaceae	Isoetes	shangrilaensis			Xiang Li, Yuqian Huang, X.Dai & Xing Liu, 2019	DD	China	Shangri-la		Endemic to Qinghai-Tibetan Plateau
33	Plantae	Pteridophyta	Equisetopsida	Marattiales	Marattiaceae	Angiopteris	esculenta			Ching, 1940	DD	China	Gongshan, Fugong, Motuo
34	Plantae	Pteridophyta	Equisetopsida	Marattiales	Marattiaceae	Angiopteris	wallichiana			C.Presl, 1845	DD	China, India, Nepal	Motuo
35	Plantae	Pteridophyta	Equisetopsida	Marattiales	Marattiaceae	Angiopteris	fokiensis			Hieron., 1919	DD	China, Japan	Tianquan
36	Plantae	Pteridophyta	Equisetopsida	Cyatheales	Cibotiaceae	Cibotium	barometz			(L.)J. Smith,1842	LC	China, India, Indonesia, Japan, Malaysia, Myanmar, Thailand, Vietnam	Motuo
37	Plantae	Pteridophyta	Equisetopsida	Cyatheales	Cyatheaceae	Sphaeropteris	brunoniana			(Hook.) R.M.Tryon, 1970	EN	China, Bhutan, Nepal, India, Bangladesh, Myanmar, Vietnam	Motuo
38	Plantae	Pteridophyta	Equisetopsida	Cyatheales	Cyatheaceae	Gymnosphaera	andersonii			(J.Scott ex Bedd.) Ching & S.K.Wu, 1983	DD	China	Motuo
39	Plantae	Pteridophyta	Equisetopsida	Cyatheales	Cyatheaceae	Gymnosphaera	khasyana			(Moore ex Kuhn) Ching, 1984	DD	China, India, Myanmar	Gongshan, Motuo
40	Plantae	Pteridophyta	Equisetopsida	Cyatheales	Cyatheaceae	Gymnosphaera	metteniana			(Hance) Tagawa, 1951	DD	China, Japan	Baoxing
41	Plantae	Pteridophyta	Equisetopsida	Cyatheales	Cyatheaceae	Alsophila	costularis			Baker, 1906	LC	China, Bhutan, India, Vietnam, Myanmar, Bangladesh	Motuo
42	Plantae	Pteridophyta	Equisetopsida	Cyatheales	Cyatheaceae	Alsophila	spinulosa			(Hook.) R.M.Tryon, 1970	NT	China, Japan, Vietnam, Cambodia, Thailand, Myanmar, Bangladesh, Bhutan, Nepal, India	Gongshan, Fugong, Motuo
43	Plantae	Pteridophyta	Equisetopsida	Polypodiales	Cystopteridaceae	Cystopteris	chinensis			(Ching) X.C.Zhang & R.Wei, 2014	EW	China	Dujiangyan, Tianquan
44	Plantae	Gymnospermae	Pinopsida	Araucariales	Podocarpaceae	Podocarpus	macrophyllus			(Thunb.) Sweet, 1818	LC	China, Japan	Tianquan, Wenchuan, Kangding
45	Plantae	Gymnospermae	Pinopsida	Araucariales	Podocarpaceae	Podocarpus	neriifolius			D. Don, 1824	LC	China, Nepal, India, Bhutan, Myanmar, Vietnam, Laos, Indonesia, Malaysia	Dujiangyan, Baoxing, Motuo
46	Plantae	Gymnospermae	Pinopsida	Cupressales	Cupressaceae	Cupressus	chengiana			S.Y. Hu, 1964	VU	China	Wenchuan, Lixian, Maoxian, Jinchuan, Xiaojin, Madongkang, Xiangcheng, Kangding, Mangkang		Endemic to Qinghai-Tibetan Plateau
47	Plantae	Gymnospermae	Pinopsida	Cupressales	Cupressaceae	Cupressus	gigantea			W.C. Cheng & L.K. Fu, 1975	VU	China	Cuona, Linzhi, Milin, Langxian, Bomi		Endemic to Qinghai-Tibetan Plateau
48	Plantae	Gymnospermae	Pinopsida	Cupressales	Cupressaceae	Cupressus	torulosa			D. Don, 1824	LC	China, India, Nepal, Bhutan	Deqin, Mangkang, Linzhi, Motuo, Bomi, Langxian
49	Plantae	Gymnospermae	Pinopsida	Cupressales	Cupressaceae	Taiwania	cryptomerioides			Hayata, 1906	VU	China	Gongshan, Fugong, Lanping, Yunlong
50	Plantae	Gymnospermae	Pinopsida	Cupressales	Cupressaceae	Thuja	sutchuenensis			Franch., 1899	EN	China	Ganzi
51	Plantae	Gymnospermae	Pinopsida	Cupressales	Taxaceae	Cephalotaxus	hainanensis			H.L. Li, 1954	EN	China, Vietnam	Motuo
52	Plantae	Gymnospermae	Pinopsida	Cupressales	Taxaceae	Cephalotaxus	griffithii			Hook. f., 1888	EN	China, Myanmar	Gongshan
53	Plantae	Gymnospermae	Pinopsida	Cupressales	Taxaceae	Amentotaxus	argotaenia			(Hance) Pilg., 1916	NT	China, Vietnam	Dujiangyan, Fugong, Motuo, Wenxian
54	Plantae	Gymnospermae	Pinopsida	Cupressales	Taxaceae	Taxus	contorta			Griff., 1854	EN	China, India, Kashmir, Nepal, Pakistan	Jilong
55	Plantae	Gymnospermae	Pinopsida	Cupressales	Taxaceae	Taxus	florinii			Spjut, 2007	DD	China	Mianning, Shangri-la, Deqin, Yulong
56	Plantae	Gymnospermae	Pinopsida	Cupressales	Taxaceae	Taxus	wallichiana			Zucc., 1843	EN	China, Bhutan, N India, Laos, Myanmar, Vietnam	Jinchuan, Madongkang, Aba, Jiuzhaigou, Danba, Muli, Yulong, Fugong, Gongshan, Deqin, Weixi, Cuona, Rikaze, Yadong, Jilong, Linzhi, Motuo, Chayu, Bomi, Wenxian
57	Plantae	Gymnospermae	Pinopsida	Cupressales	Taxaceae	Taxus	wallichiana		mairei	(Lem��e & H.L��v.) L.K. Fu & Nan Li, 1997	VU	China, India, Laos, Myanmar, Vietnam	Dujiangyan, Tianquan, Lushan, Baoxing, Wenchuan, Lixian, Maoxian, Jinchuan, Xiaojin, Madongkang, Xiangcheng, Kangding, Deqin, Gongshan, Shangri-la, Weixi, Yunlong, Yulong, Jilong, Chayu, Tanchang, Kangle, Zhouqu
58	Plantae	Gymnospermae	Pinopsida	Cupressales	Taxaceae	Taxus	wallichiana		chinensis	(Pilg.) Florin,1948	VU	China, Vietnam	Dujiangyan, Shimian, Tianquan, Lushan, Baoxing, Wenchuan, Lixian, Maoxian, Jinchuan, Xiaojin, Madongkang, Xiangcheng, Kangding, Aba, Jiuzhaigou, Luding, Danba, Muli, Yanyuan, Pingwu, Weixi, Wenxian, Zhouqu
59	Plantae	Gymnospermae	Pinopsida	Cupressales	Taxaceae	Taxus	yunnanensis			W.C. Cheng & L.K. Fu, 1975	DD	China	Madongkang, Luding, Danba, Muli, Jiulong, Yanyuan, Xichang, Yulong, Lanping, Gongshan, Deqin, Weixi, Yulong, Ninglang, Yunlong, Shangri-la, Cuona, Yadong, Jilong, Motuo, Chayu, Bomi, Wenxian
60	Plantae	Gymnospermae	Pinopsida	Cupressales	Taxaceae	Torreya	fargesii			Franch., 1899	VU	China	Baoxing, Gongshan, Wenxian
61	Plantae	Gymnospermae	Pinopsida	Cupressales	Taxaceae	Torreya	yunnanensis			W.C.Cheng & L.K.Fu, 1975	DD	China	Gongshan, Weixi, Yulong, Shangri-la, Lanping
62	Plantae	Gymnospermae	Pinopsida	Pinales	Pinaceae	Abies	chensiensis			Tiegh., 1892	LC	China	Kangding, Yulong, Gongshan, Chayu, Zhouqu, Diebu
63	Plantae	Gymnospermae	Pinopsida	Pinales	Pinaceae	Keteleeria	fortunei		cyclolepis	(Flous) Silba, 1990	DD	China	Shimian
64	Plantae	Gymnospermae	Pinopsida	Pinales	Pinaceae	Keteleeria	hainanensis			Chun & Tsiang, 1963	EN	China	Jiulong
65	Plantae	Gymnospermae	Pinopsida	Pinales	Pinaceae	Picea	neoveitchii			Mast., 1903	DD	China	Pingwu, Baoxing, Lixian, Xiaojin, Minxian, Zhuoni, Zhouqu
66	Plantae	Gymnospermae	Pinopsida	Pinales	Pinaceae	Pseudotsuga	brevifolia			W.C. Cheng & L.K. Fu, 1975	VU	China	Deqin
67	Plantae	Gymnospermae	Pinopsida	Pinales	Pinaceae	Pseudotsuga	forrestii			Craib, 1920	VU	China	Luding, Daocheng, Gongshan, Deqin, Weixi, Lanping, Yulong, Chayu		Endemic to Qinghai-Tibetan Plateau
68	Plantae	Gymnospermae	Pinopsida	Pinales	Pinaceae	Pseudotsuga	sinensis			Dode, 1912	VU	China	Mianning, Xichang, Deqin
69	Plantae	Angiospermae	Magnoliopsida	Piperales	Aristolochiaceae	Saruma	henryi			Oliv., 1889	EN	China	Maoxian
70	Plantae	Angiospermae	Magnoliopsida	Magnoliales	Myristicaceae	Horsfieldia	hainanensis			Merr., 1932	DD	China	Lushui
71	Plantae	Angiospermae	Magnoliopsida	Magnoliales	Myristicaceae	Horsfieldia	kingii			(Hook.f.) Warb., 1897	VU	China, India, Bangladesh	Lushui
72	Plantae	Angiospermae	Magnoliopsida	Magnoliales	Myristicaceae	Horsfieldia	tetratepala			C.Y. Wu & W.T. Wang, 1957	DD	China	Lushui
73	Plantae	Angiospermae	Magnoliopsida	Magnoliales	Magnoliaceae	Houpoea	officinalis			(Rehder & E.H.Wilson) N.H.Xia & C.Y.Wu, 2008	NT	China	Dujiangyan, Beichuan, Baoxing, Songpan, Mianning, Gongshan, Zhouqu, Wenxian
74	Plantae	Angiospermae	Magnoliopsida	Magnoliales	Magnoliaceae	Houpoea	rostrata			(W.W.Sm.) N.H.Xia & C.Y.Wu, 2008	VU	China, Myanmar	Lushui, Gongshan, Yunlong, Lushui, Fugong, Motuo
75	Plantae	Angiospermae	Magnoliopsida	Magnoliales	Magnoliaceae	Lirianthe	henryi			(Dunn) N.H.Xia & C.Y.Wu, 2008	EN	China, Myanmar, Thailand	Gongshan, Deqin, Weixi, Yulong
76	Plantae	Angiospermae	Magnoliopsida	Magnoliales	Magnoliaceae	Alcimandra	cathcartii			Dandy, 1927	LC	China, India	Gongshan, Fugong, Motuo
77	Plantae	Angiospermae	Magnoliopsida	Magnoliales	Magnoliaceae	Liriodendron	chinense			(Hemsl.) Sarg., 1903	NT	China, Vietnam	Dujiangyan
78	Plantae	Angiospermae	Magnoliopsida	Magnoliales	Magnoliaceae	Michelia	wilsonii			Finet & Gagnep., 1906	EN	China	Luding
79	Plantae	Angiospermae	Magnoliopsida	Magnoliales	Magnoliaceae	Oyama	sinensis			(Rehder & E.H.Wilson) N.H.Xia & C.Y.Wu, 2008	VU	China	Dujiangyan, Shimian, Tianquan, Baoxing, Wenchuan, Mianning, Lhasa
80	Plantae	Angiospermae	Magnoliopsida	Magnoliales	Magnoliaceae	Oyama	wilsonii			(Finet & Gagnep.) N.H.Xia & C.Y.Wu, 2008	NT	China	Songpan, Luding, Mianning, Yulong, Lanping, Jianchuan, Yadong, Motuo
81	Plantae	Angiospermae	Magnoliopsida	Laurales	Lauraceae	Cinnamomum	longepaniculatum			(Gamble) N.Chao ex H.W.Li, 1975	NT	China	Tianquan, Baoxing, Luding, Pingwu, Wenxian
82	Plantae	Angiospermae	Magnoliopsida	Laurales	Lauraceae	Machilus	nanmu			(Oliv.) Hemsl., 1891	EN	China	Dujiangyan, Shimian, Lushan, Luding, Wenchuan, Mianning, Lushui, Motuo, Chayu
83	Plantae	Angiospermae	Magnoliopsida	Laurales	Lauraceae	Phoebe	bournei			(Hemsl.) Yang, 1945	NT	China	Tianquan
84	Plantae	Angiospermae	Magnoliopsida	Laurales	Lauraceae	Phoebe	hui			Cheng ex Yang, 1945	NT	China	Dujiangyan, Shimian, Tianquan
85	Plantae	Angiospermae	Magnoliopsida	Laurales	Lauraceae	Phoebe	zhennan			S.K. Lee & F.N. Wei, 1979	VU	China	Dujiangyan, Luding, Tianquan, Daocheng
86	Plantae	Angiospermae	Magnoliopsida	Alismatales	Scheuchzeriaceae	Scheuchzeria	palustris			Linnaeus, 1753	VU	China, Japan, Korea, Mongolia, Russia, SW Asia, Europe, North America	Baoxing, Gaize, Naqu
87	Plantae	Angiospermae	Magnoliopsida	Alismatales	Hydrocharitaceae	Ottelia	acuminata			(Gagnep.) Dandy, 1934	VU	China	Yulong, Ninglang, Jianchuan, Yunlong, Lushui, Lanping, Fugong, Gongshan, Shangri-la, Weixi, Deqin
88	Plantae	Angiospermae	Magnoliopsida	Alismatales	Hydrocharitaceae	Ottelia	acuminata		crispa	(Hand.-Mazz.) H.Li, 1981	NT	China	Yanyuan, Yulong		Endemic to Qinghai-Tibetan Plateau
89	Plantae	Angiospermae	Magnoliopsida	Pandanales	Velloziaceae	Acanthochlamys	bracteata			P.C. Kao, 1980	VU	China	Madongkang, Daofu, Xiangcheng		Endemic to Qinghai-Tibetan Plateau
90	Plantae	Angiospermae	Magnoliopsida	Liliales	Melanthiaceae	Paris	axialis			H. Li, 1984	VU	China	Dujiangyan, Tianquan, Baoxing, Fugong, Motuo
91	Plantae	Angiospermae	Magnoliopsida	Liliales	Melanthiaceae	Paris	bashanensis			F.T. Wang & Tang, 1978	NT	China	Baoxing, Maoxian
92	Plantae	Angiospermae	Magnoliopsida	Liliales	Melanthiaceae	Paris	delavayi			Franch., 1898	VU	China, Vietnam	Luding, Fugong, Deqin, Weixi
93	Plantae	Angiospermae	Magnoliopsida	Liliales	Melanthiaceae	Paris	dulongensis			H. Li & Kurita, 1992	CR	China	Gongshan		Endemic to Qinghai-Tibetan Plateau
94	Plantae	Angiospermae	Magnoliopsida	Liliales	Melanthiaceae	Paris	fargesii			Franch., 1898	NT	China, Vietnam	Xichang, Gongshan, Fugong, Weixi
95	Plantae	Angiospermae	Magnoliopsida	Liliales	Melanthiaceae	Paris	fargesii		petiolata	(Baker ex C.H.Wright) F.T.Wang & Tang, 1978	EN	China	Tianquan, Baoxing, Lushui, Chayu
96	Plantae	Angiospermae	Magnoliopsida	Liliales	Melanthiaceae	Paris	forrestii			(Takht.) H.Li, 1984	EN	China, Myanmar	Tianquan, Baoxing, Muli, Yanyuan, Yulong, Lushui, Fugong, Gongshan, Weixi, Deqin, Lanping, Motuo, Chayu
97	Plantae	Angiospermae	Magnoliopsida	Liliales	Melanthiaceae	Paris	mairei			H.L��v., 1912	EN	China	Dayi, Kangding, Luding, Jiulong, Daocheng, Muli, Yanyuan, Yulong, Fugong, Lanping, Deqin, Weixi, Ninglang, Shangri-la, Dingjie, Linzhi, Motuo
98	Plantae	Angiospermae	Magnoliopsida	Liliales	Melanthiaceae	Paris	marmorata			Stearn, 1956	DD	China, Bhutan, India, Nepal	Yanyuan, Gongshan, Dingjie
99	Plantae	Angiospermae	Magnoliopsida	Liliales	Melanthiaceae	Paris	polyphylla			Sm., 1813	VU	China, Bhutan, India, Laos, Myanmar, Nepal, Thailand, Vietnam	Dujiangyan, Shimian, Tianquan, Baoxing, Lixian, Maoxian, Songpan, Xiaojin, Aba, Kangding, Luding, Jiulong, Muli, Mianning, Beichuan, Pingwu, Xichang, Yanbian, Yulong, Lushui, Fugong, Gongshan, Weixi, Lanping, Dingjie, Yadong, Jilong, Nielamu, Linzhi, Milin, Motuo, Bomi, Chayu, Xunhua, Minxian, Wenxian, Kangxian, Kangle, Zhouqu, Diebu
100	Plantae	Angiospermae	Magnoliopsida	Liliales	Melanthiaceae	Paris	polyphylla		alba	H.Li & R.J.Mitch., 1986	VU	China	Yulong
101	Plantae	Angiospermae	Magnoliopsida	Liliales	Melanthiaceae	Paris	polyphylla		chinensis	(Franch.) H.Hara, 1969	VU	China, Laos, Myanmar, Thailand, Vietnam	Dujiangyan, Baoxing, Maoxian, Lushui, Deqin, Motuo
102	Plantae	Angiospermae	Magnoliopsida	Liliales	Melanthiaceae	Paris	polyphylla		latifolia	F.T.Wang & C.Yu Chang, 1978	LC	China	Zhouqu, Tanchang, Wenxian
103	Plantae	Angiospermae	Magnoliopsida	Liliales	Melanthiaceae	Paris	polyphylla		stenophylla	Franch., 1888	NT	China, Bhutan, India, Myanmar, Nepal	Dujiangyan, Shimian, Tianquan, Baoxing, Wenchuan, Lixian, Maoxian, Songpan, Jinchuan, Xiaojin, Heishui, Kangding, Luding, Muli, Mianning, Yulong, Ninglang, Jianchuan, Yunlong, Lushui, Fugong, Gongshan, Shangri-la, Weixi, Deqin, Nielamu, Chayu, Motuo, Dingjie, Wenxian, Kangxian, Zhouqu
104	Plantae	Angiospermae	Magnoliopsida	Liliales	Melanthiaceae	Paris	polyphylla		thibetica	(Franch.) H.Hara, 1969	NT	China	Luding, Maoxian, Weixi
105	Plantae	Angiospermae	Magnoliopsida	Liliales	Melanthiaceae	Paris	polyphylla		yunnanensis	(Franch.) Hand.-Mazz., 1936	NT	China, India, Myanmar	Dujiangyan, Baoxing, Kangding, Luding, Daocheng, Muli, Yulong, Ninglang, Jianchuan, Yunlong, Lushui, Fugong, Gongshan, Shangri-la, Weixi, Deqin
106	Plantae	Angiospermae	Magnoliopsida	Liliales	Melanthiaceae	Paris	rugosa			H.Li & S.Kurita, 1992	EN	China	Gongshan
107	Plantae	Angiospermae	Magnoliopsida	Liliales	Melanthiaceae	Paris	thibetica			Franch., 1888	NT	China, Bhutan, Myanmar, India	Dujiangyan, Pingwu, Shimian, Tianquan, Baoxing, Lixian, Kangding, Luding, Jiulong, Yanyuan, Beichuan, Xichang, Yanbian, Lushui, Gongshan, Weixi, Dingjie, Yadong, Jilong, Nielamu, Linzhi, Motuo, Chayu, Wenxian
108	Plantae	Angiospermae	Magnoliopsida	Liliales	Melanthiaceae	Paris	thibetica		apetala	Hand.-Mazz., 1925	DD	China, Bhutan, Myanmar, India	Luding, Shimian, Gongshan, Weixi, Deqin, Fugong, Ninglang
109	Plantae	Angiospermae	Magnoliopsida	Liliales	Melanthiaceae	Paris	wenxianensis			Z.X. Peng & R.N. Zhao, 1986	CR	China	Wenxian
110	Plantae	Angiospermae	Magnoliopsida	Liliales	Liliaceae	Cardiocrinum	cathayanum			(E.H.Wilson) Stearn, 1948	LC	China	Yulong, Gongshan, Deqin, Weixi
111	Plantae	Angiospermae	Magnoliopsida	Liliales	Liliaceae	Fritillaria	cirrhosa			D. Don, 1825	NT	China, Bhutan, India, Nepal	Tianquan, Maoxian, Songpan, Xiaojin, Ruodonggai, Kangding, Luding, Jiulong, Yajiang, Daofu, Batang, Xiangcheng, Daocheng, Muli, Mianning, Yulong, Ninglang, Gongshan, Shangri-la, Weixi, Deqin, Lhasa, Linzhou, Leiwuqi, Basu, Zuogong, Mangkang, Dingjie, Yadong, Jilong, Nielamu, Jiali, Biru, Suo, Linzhi, Milin, Bomi, Chayu, Jiuzhi, Yushu, Nangqian
112	Plantae	Angiospermae	Magnoliopsida	Liliales	Liliaceae	Fritillaria	crassicaulis			S.C. Chen, 1977	VU	China	Luding, Mianning, Yulong, Shangri-la, Lushui, Gongshan
113	Plantae	Angiospermae	Magnoliopsida	Liliales	Liliaceae	Fritillaria	dajinensis			S.C. Chen, 1983	EN	China	Xiaojin, Shiqu, Jinchuan		Endemic to Qinghai-Tibetan Plateau
114	Plantae	Angiospermae	Magnoliopsida	Liliales	Liliaceae	Fritillaria	davidii			Franch., 1888	EN	China	Pengzhou, Tianquan, Baoxing
115	Plantae	Angiospermae	Magnoliopsida	Liliales	Liliaceae	Fritillaria	delavayi			Franch., 1898	VU	China, Bhutan, India	Daofu, Shiqu, Seda, Xiangcheng, Daocheng, Muli, Yulong, Shangri-la, Changdong, Basu, Jiacha, Nanmulin, Milin, Chayu, Yadong, Lhasa, Changdong, Dingqing, Yushu, Zadong, Chengdong, Zhidong, Henan, Zeku, Tongde, Guinan, Xinghai, Maqin, Madong, Gande, Dari, Banma, Jiuzhi, Nangqian, Qumalai
116	Plantae	Angiospermae	Magnoliopsida	Liliales	Liliaceae	Fritillaria	fusca			Turrill, 1943	EN	China	Jiacha, Nanmulin		Endemic to Qinghai-Tibetan Plateau
117	Plantae	Angiospermae	Magnoliopsida	Liliales	Liliaceae	Fritillaria	przewalskii			Maxim., 1882	VU	China	Ganzi, Dege, Shiqu, Seda, Ruodonggai, Jiuzhaigou, Rangtang, Jinchuan, Xining, Huangyuan, Datong, Pingan, Huzhu, Hualong, Qilian, HaiYan, Gangcha, Menyuan, Gonghe, Tianjun, Huangzhong, Minhe, Ledong, Xunhua, Tongren, Jianzha, Zeku, Henan, Tongde, Guinan, Xinghai, Guide, Maqin, Madong, Gande, Dari, Banma, Jiuzhi, Yushu, Zadong, Chengdong, Nangqian, Zadong, Zhidong, Qumalai		Endemic to Qinghai-Tibetan Plateau
118	Plantae	Angiospermae	Magnoliopsida	Liliales	Liliaceae	Fritillaria	sichuanica			S.C. Chen, 1983	VU	China	Kangding, Xiaojin, Baoxing, Wenchuan, Tianquan, Lushan, Zhidong, Nangqian, Yushu		Endemic to Qinghai-Tibetan Plateau
119	Plantae	Angiospermae	Magnoliopsida	Liliales	Liliaceae	Fritillaria	sinica			S.C. Chen, 1981	VU	China	Tianquan, Luding, Mianning, Yanyuan		Endemic to Qinghai-Tibetan Plateau
120	Plantae	Angiospermae	Magnoliopsida	Liliales	Liliaceae	Fritillaria	unibracteata			Hsiao & K.C.Hsia, 1977	EN	China	Lixian, Maoxian, Songpan, Jinchuan, Xiaojin, Heishui, Madongkang, Aba, Ruodonggai, Hongyuan, Ganzi, Daofu, Henan, Tongde, Xinghai, Maqin, Jiuzhi, Zadong, Tongren, Lintan		Endemic to Qinghai-Tibetan Plateau
121	Plantae	Angiospermae	Magnoliopsida	Liliales	Liliaceae	Fritillaria	unibracteata		longinectarea	S.Y. Tang & C.H. Yueh, 1991	CR	China	Aba		Endemic to Qinghai-Tibetan Plateau
122	Plantae	Angiospermae	Magnoliopsida	Liliales	Liliaceae	Fritillaria	walujewii			Regel, 1879	EN	China, Kazakhstan	Huzhu
123	Plantae	Angiospermae	Magnoliopsida	Liliales	Liliaceae	Lilium	fargesii			Franch., 1892	NT	China	Shangri-la
124	Plantae	Angiospermae	Magnoliopsida	Liliales	Liliaceae	Lilium	papilliferum			Franch., 1892	NT	China	Muli, Yulong, Chayu
125	Plantae	Angiospermae	Magnoliopsida	Liliales	Liliaceae	Tulipa	dasystemon			Regel, 1879	LC	China, Kazakhstan, Kyrgyzstan, Tajikistan, Uzbekistan	Wuqia
126	Plantae	Angiospermae	Magnoliopsida	Asparagales	Orchidaceae	Anoectochilus	roxburghii			Lindl., 1832	EN	China, Japan, Thailand, Laos, Vietnam, India, Bhutan, Nepal, Bangladesh	Gongshan, Motuo
127	Plantae	Angiospermae	Magnoliopsida	Asparagales	Orchidaceae	Anoectochilus	medogensis			H. Z. Tian & Yue Jin, 2021	DD	China	Motuo
128	Plantae	Angiospermae	Magnoliopsida	Asparagales	Orchidaceae	Bletilla	striata			Rchb.f., 1878	EN	China, Korea, Japan	Shimian, Tianquan, Tongjiang, Wenchuan, Maoxian, Luding, Jiulong, Yanyuan, Mianning, Yulong, Gongshan, Deqin, Wenxian
129	Plantae	Angiospermae	Magnoliopsida	Asparagales	Orchidaceae	Calanthe	dulongensis			H. Li, R. Li & Z.L. Dao, 2003	CR	China	Gongshan		Endemic to Qinghai-Tibetan Plateau
130	Plantae	Angiospermae	Magnoliopsida	Asparagales	Orchidaceae	Changnienia	amoena			S.S. Chien, 1935	EN	China	Wenchuan, Maoxian, Yanyuan, Wenxian
131	Plantae	Angiospermae	Magnoliopsida	Asparagales	Orchidaceae	Corybas	taliensis			Tang & F.T. Wang, 1951	EN	China	Deqin, Fugong
132	Plantae	Angiospermae	Magnoliopsida	Asparagales	Orchidaceae	Cremastra	appendiculata			(D.Don) Makino, 1904	NT	China, Nepal, Bhutan, India, Vietnam, Thailand, Japan	Tianquan, Fugong, Gongshan, Bomi, Motuo, Wenxian, Zhouqu
133	Plantae	Angiospermae	Magnoliopsida	Asparagales	Orchidaceae	Cymbidium	concinnum			Z.J. Liu & S.C. Chen, 2006	DD	China	Lushui
134	Plantae	Angiospermae	Magnoliopsida	Asparagales	Orchidaceae	Cymbidium	cyperifolium			Wall. ex Lindl., 1833	VU	China, Nepal, Bhutan, India, Myanmar, Thailand, Vietnam, Cambodia, Philippines	Motuo
135	Plantae	Angiospermae	Magnoliopsida	Asparagales	Orchidaceae	Cymbidium	eburneum			Lindl., 1847	EN	China, Nepal, India, Myanmar	Gongshan, Fugong, Lushui, Motuo
136	Plantae	Angiospermae	Magnoliopsida	Asparagales	Orchidaceae	Cymbidium	elegans			Lindl., 1833	EN	China, Nepal, Bhutan, India, Myanmar	Fugong, Gongshan, Shangri-la, Motuo, Chayu
137	Plantae	Angiospermae	Magnoliopsida	Asparagales	Orchidaceae	Cymbidium	ensifolium			(L.) Sw., 1799	VU	China, Japan, Southeast and South Asia	Baoxing, Heishui, Luding, Deqin, Motuo, Wenxian
138	Plantae	Angiospermae	Magnoliopsida	Asparagales	Orchidaceae	Cymbidium	erythraeum			Lindl., 1858	VU	China, Nepal, Bhutan, India, Myanmar	Gongshan, Motuo, Bomi, Chayu
139	Plantae	Angiospermae	Magnoliopsida	Asparagales	Orchidaceae	Cymbidium	faberi			Rolfe, 1896	EN	China, Nepal, India	Tianquan, Jiuzhaigou, Heishui, Yulong, Lushui, Lanping, Shangri-la, Weixi, Deqin, Bomi, Motuo, Wenxian
140	Plantae	Angiospermae	Magnoliopsida	Asparagales	Orchidaceae	Cymbidium	floribundum			Lindl., 1833	VU	China, Vietnam	Yulong, Lushui, Lanping, Shangri-la, Weixi, Deqin
141	Plantae	Angiospermae	Magnoliopsida	Asparagales	Orchidaceae	Cymbidium	goeringii			Rchb.f., 1852	VU	China, Japan, Korea	Tianquan, Luding, Yulong, Weixi
142	Plantae	Angiospermae	Magnoliopsida	Asparagales	Orchidaceae	Cymbidium	hookerianum			Rchb.f., 1866	EN	China, Nepal, Bhutan, India	Tianquan, Luding, Fugong, Gongshan, Yulong, Chayu
143	Plantae	Angiospermae	Magnoliopsida	Asparagales	Orchidaceae	Cymbidium	iridioides			D. Don, 1825	VU	China, Nepal, Bhutan, India, Myanmar	Gongshan, Weixi, Fugong, Deqin, Dingjie, Linzhi, Motuo, Bomi, Chayu
144	Plantae	Angiospermae	Magnoliopsida	Asparagales	Orchidaceae	Cymbidium	kanran			Makino, 1902	VU	China, Japan, Korea	Gongshan, Motuo
145	Plantae	Angiospermae	Magnoliopsida	Asparagales	Orchidaceae	Cymbidium	motuoense			W. Q. Hu, Q. H. Zhang & Z. J. Liu, 2021	DD	China	Motuo
146	Plantae	Angiospermae	Magnoliopsida	Asparagales	Orchidaceae	Cymbidium	nanulum			Y.S. Wu & S.C. Chen, 1991	EN	China	Lushui
147	Plantae	Angiospermae	Magnoliopsida	Asparagales	Orchidaceae	Cymbidium	�� nujiangense			X. P. Zhou, S. P. Lei & Z. J. Liu, 2007	DD	China	Lushui
148	Plantae	Angiospermae	Magnoliopsida	Asparagales	Orchidaceae	Cymbidium	serratum			Schltr., 1919	NT	China	Weixi
149	Plantae	Angiospermae	Magnoliopsida	Asparagales	Orchidaceae	Cymbidium	sichuanicum			Z.J. Liu & S.C. Chen, 2006	NT	China	Maoxian, Wenchuan
150	Plantae	Angiospermae	Magnoliopsida	Asparagales	Orchidaceae	Cymbidium	sinense			Willd., 1805	VU	China, India, Myanmar, Vietnam, Thailand, Japan	Yulong
151	Plantae	Angiospermae	Magnoliopsida	Asparagales	Orchidaceae	Cymbidium	tracyanum			L.Castle, 1890	LC	China, Myanmar, Thailand	Gongshan, Fugong
152	Plantae	Angiospermae	Magnoliopsida	Asparagales	Orchidaceae	Cymbidium	tortisepalum			Fukuy., 1934	VU	China	Gongshan��Weixi
153	Plantae	Angiospermae	Magnoliopsida	Asparagales	Orchidaceae	Cypripedium	bardolphianum			W.W. Smith & R.J. Farrer, 1916	VU	China	Songpan, Yulong, Shangri-la, Weixi, Deqin, Chayu, Tanchang, Diebu		Endemic to Qinghai-Tibetan Plateau
154	Plantae	Angiospermae	Magnoliopsida	Asparagales	Orchidaceae	Cypripedium	calcicola			Schltr., 1924	EN	China	Songpan, Kangding, Litang, Yulong, Shangri-la, Weixi, Deqin, Menyuan
155	Plantae	Angiospermae	Magnoliopsida	Asparagales	Orchidaceae	Cypripedium	cordigerum			D. Don, 1825	VU	China, Nepal, Bhutan, India, Pakistan	Yadong
156	Plantae	Angiospermae	Magnoliopsida	Asparagales	Orchidaceae	Cypripedium	debile			Rchb.f., 1874	VU	China, Japan	Shimian, Tianquan, Baoxing, Lixian, Maoxian, Jinchuan, Xiaojin, Kangding, Luding
157	Plantae	Angiospermae	Magnoliopsida	Asparagales	Orchidaceae	Cypripedium	elegans			Rchb.f., 1886	EN	China, Nepal, Bhutan, India	Yulong, Gongshan, Shangri-la, Jilong
158	Plantae	Angiospermae	Magnoliopsida	Asparagales	Orchidaceae	Cypripedium	fargesii			Franch., 1894	EN	China	Wenchuan, Jinchuan, Zhouqu
159	Plantae	Angiospermae	Magnoliopsida	Asparagales	Orchidaceae	Cypripedium	farreri			W.W. Sm., 1916	EN	China	Baoxing, Lushui, Lanping, Shangri-la		Endemic to Qinghai-Tibetan Plateau
160	Plantae	Angiospermae	Magnoliopsida	Asparagales	Orchidaceae	Cypripedium	fasciolatum			Franch., 1894	EN	China	Dujiangyan, Tianquan, Luding, Chayu
161	Plantae	Angiospermae	Magnoliopsida	Asparagales	Orchidaceae	Cypripedium	flavum			P.F. Hunt & Summerh., 1966	VU	China	Tianquan, Baoxing, Wenchuan, Lixian, Maoxian, Songpan, Jiuzhaigou, Jinchuan, Xiaojin, Heishui, Ruodonggai, Ganzi, Kangding, Luding, Jiulong, Xiangcheng, Daocheng, Muli, Yanyuan, Yulong, Deqin, Weixi, Gongshan, Shangri-la, Jilong, Chayu, Minhe, Datong, Xunhua, Tanchang, Zhouqu, Diebu, Xiahe
162	Plantae	Angiospermae	Magnoliopsida	Asparagales	Orchidaceae	Cypripedium	forrestii			P.J. Cribb, 1992	CR	China	Shangri-la, Yulong
163	Plantae	Angiospermae	Magnoliopsida	Asparagales	Orchidaceae	Cypripedium	franchetii			Rolfe, 1912	EN	China	Baoxing, Wenchuan, Lixian, Songpan, Heishui, Aba, Kangding, Yulong, Xining, Huangyuan, Datong, Pingan, Hualong, Qilian, HaiYan, Gangcha, Menyuan, Tongren, Jianzha, Gonghe, Guide, Tianjun, Huangzhong, Minhe, Xunhua, Ledong, Huzhu, Nangqian, Yushu, Minxian, Wenxian, Tanchang, Zhouqu, Diebu, Xiahe
164	Plantae	Angiospermae	Magnoliopsida	Asparagales	Orchidaceae	Cypripedium	guttatum			Sw., 1800	LC	China, Bhutan, Korea, Russia, Europe, North America	Tianquan, Wenchuan, Lixian, Maoxian, Jinchuan, Xiaojin, Kangding, Jiulong, Daofu, Ganzi, Daocheng, Muli, Shangri-la, Deqin, Yulong, Ninglang, Gongshan, Gongjue, Luozha, Yadong, Milin, Chayu, Gongbujiangda, Nangqian, Yushu, Xunhua
165	Plantae	Angiospermae	Magnoliopsida	Asparagales	Orchidaceae	Cypripedium	henryi			Rolfe, 1892	VU	China	Dujiangyan, Baoxing, Songpan, Ruodonggai, Luding, Gongshan, Weixi, Deqin, Minhe, Huzhu, Datong, Wenxian, Zhouqu
166	Plantae	Angiospermae	Magnoliopsida	Asparagales	Orchidaceae	Cypripedium	himalaicum			Rolfe ex Hemsl., 1892	EN	China, Nepal, Bhutan, India	Jilong
167	Plantae	Angiospermae	Magnoliopsida	Asparagales	Orchidaceae	Cypripedium	japonicum			Thunb., 1784	EN	China, Japan	Maoxian, Wenxian
168	Plantae	Angiospermae	Magnoliopsida	Asparagales	Orchidaceae	Cypripedium	lichiangense			S.C. Chen & P.J. Cribb, 1994	EN	China	Yulong, Shangri-la, Weixi		Endemic to Qinghai-Tibetan Plateau
169	Plantae	Angiospermae	Magnoliopsida	Asparagales	Orchidaceae	Cypripedium	ludlowii			P.J.Cribb, 1997	EN	China	Bomi		Endemic to Qinghai-Tibetan Plateau
170	Plantae	Angiospermae	Magnoliopsida	Asparagales	Orchidaceae	Cypripedium	macranthos			Sw., 1800	LC	China, Japan, Korea, Russia	Heishui, Xiaojin, Luding, Baoxing, Hongyuan, Kangding, Linzhi, Chayu, Bomi, Milin, Luozha, Yadong, Jilong, Banma, Nangqian, Yushu, Maqin, Tongren, Yecheng, Pishan
171	Plantae	Angiospermae	Magnoliopsida	Asparagales	Orchidaceae	Cypripedium	margaritaceum			Franch., 1888	EN	China	Muli, Yanyuan, Yulong, Shangri-la		Endemic to Qinghai-Tibetan Plateau
172	Plantae	Angiospermae	Magnoliopsida	Asparagales	Orchidaceae	Cypripedium	micranthum			Franchet, 1894	EN	China	Dayi
173	Plantae	Angiospermae	Magnoliopsida	Asparagales	Orchidaceae	Cypripedium	palangshanense			Tang & F. T. Wang, 1936	EN	China	Wenchuan, Muli
174	Plantae	Angiospermae	Magnoliopsida	Asparagales	Orchidaceae	Cypripedium	plectrochilum			Franch., 1885	NT	China, Myanmar	Baoxing, Maoxian, Songpan, Kangding, Jiulong, Daocheng, Muli, Yanyuan, Gongshan, Yulong, Ninglang, Shangri-la, Weixi, Deqin
175	Plantae	Angiospermae	Magnoliopsida	Asparagales	Orchidaceae	Cypripedium	shanxiense			S.C. Chen, 1983	NT	China, Japan, Russia	Jiuzhaigou, Madongkang, Minhe, Huzhu, Datong, Xunhua
176	Plantae	Angiospermae	Magnoliopsida	Asparagales	Orchidaceae	Cypripedium	sichuanense			Perner, 2002	EN	China	Wenchuan, Songpan		Endemic to Qinghai-Tibetan Plateau
177	Plantae	Angiospermae	Magnoliopsida	Asparagales	Orchidaceae	Cypripedium	subtropicum			S.C. Chen & K.Y. Lang, 1986	EN	China	Motuo		Endemic to Qinghai-Tibetan Plateau
178	Plantae	Angiospermae	Magnoliopsida	Asparagales	Orchidaceae	Cypripedium	taibaiense			G.H. Zhu & S.C. Chen, 1999	CR	China	Songpan
179	Plantae	Angiospermae	Magnoliopsida	Asparagales	Orchidaceae	Cypripedium	tibeticum			King ex Rolfe, 1892	LC	China, India, Bhutan	Baoxing, Wenchuan, Mao, Songpan, Jiuzhaigou, Jinchuan, Xiaojin, Madongkang, Rangtang, Ruodonggai, Hongyuan, Ganzi, Kangding, Luding, Yajiang, Daofu, Dege, Shiqu, Muli, Mianning, Yulong, Gongshan, Shangri-la, Weixi, Deqin, Luozha, Yadong, Jiali, Linzhi, Milin, Bomi, Chayu, Nangqian, Wenxian, Zhuoni, Zhouqu, Diebu
180	Plantae	Angiospermae	Magnoliopsida	Asparagales	Orchidaceae	Cypripedium	wardii			Rolfe, 1913	EN	China	Deqin, Jiangda, Chayu		Endemic to Qinghai-Tibetan Plateau
181	Plantae	Angiospermae	Magnoliopsida	Asparagales	Orchidaceae	Cypripedium	yunnanense			Franch., 1894	EN	China	Baoxing, Xiaojin, Madongkang, Hongyuan, Kangding, Dege, Yulong, Shangri-la		Endemic to Qinghai-Tibetan Plateau
182	Plantae	Angiospermae	Magnoliopsida	Asparagales	Orchidaceae	Dendrobium	aphyllum			C.E.C.Fisch., 1928	LC	China, India, Burma, Laos, Vietnam	Lushui
183	Plantae	Angiospermae	Magnoliopsida	Asparagales	Orchidaceae	Dendrobium	capillipes			Rchb.f., 1867	EN	China, India, Myanmar, Thailand, Laos, Vietnam	Lanping
184	Plantae	Angiospermae	Magnoliopsida	Asparagales	Orchidaceae	Dendrobium	cariniferum			Rchb.f., 1869	EN	China, India, Myanmar, Thailand, Laos, Vietnam	Gongshan
185	Plantae	Angiospermae	Magnoliopsida	Asparagales	Orchidaceae	Dendrobium	catenatum			Lindl., 1830	CR	China, Japan	Tianquan, Luding, Lushui, Fugong, Gongshan, Motuo, Bomi
186	Plantae	Angiospermae	Magnoliopsida	Asparagales	Orchidaceae	Dendrobium	chryseum			Rolfe,1888	EN	China	Baoxing, Xiaojin, Yulong, Gongshan, Lanping, Weixi
187	Plantae	Angiospermae	Magnoliopsida	Asparagales	Orchidaceae	Dendrobium	chrysanthum			Wall., 1828	VU	China, Nepal, Bhutan, India, Myanmar, Thailand, Laos, Vietnam	Fugong, Gongshan, Motuo
188	Plantae	Angiospermae	Magnoliopsida	Asparagales	Orchidaceae	Dendrobium	densiflorum			Lindl. ex Wall., 1830	VU	China, Nepal, Bhutan, India, Myanmar, Thailand	Motuo
189	Plantae	Angiospermae	Magnoliopsida	Asparagales	Orchidaceae	Dendrobium	denneanum			Kerr, 1933	VU	China, India, Nepal, Bhutan, Myanmar, Thailand, Laos, Vietnam	Baoxing, Xiaojin, Gongshan, Lanping, Weixi, Yulong, Shangri-la, Deqin
190	Plantae	Angiospermae	Magnoliopsida	Asparagales	Orchidaceae	Dendrobium	devonianum			Paxton, 1840	EN	China, Bhutan, India, Myanmar, Thailand, Vietnam	Lushui, Motuo
191	Plantae	Angiospermae	Magnoliopsida	Asparagales	Orchidaceae	Dendrobium	fimbriatum			Dalzell, 1852	VU	China, Bhutan, India, Myanmar, Nepal, Thailand, Vietnam	Fugong, Gongshan
192	Plantae	Angiospermae	Magnoliopsida	Asparagales	Orchidaceae	Dendrobium	hancockii			Rolfe, 1903	EN	China, Korea,Vietnam, Myanmar	Kangding, Luding
193	Plantae	Angiospermae	Magnoliopsida	Asparagales	Orchidaceae	Dendrobium	heterocarpum			Wall. ex Lindl., 1830	VU	China, Sri Lanka, India, Nepal, Bhutan, Myanmar, Thailand, Laos, Vietnam, Philippines, Malaysia, Indonesia	Lushui
194	Plantae	Angiospermae	Magnoliopsida	Asparagales	Orchidaceae	Dendrobium	hookerianum			Lindl., 1858	VU	China, India	Lushui, Gongshan, Fugong, Linzhi, Motuo, Bomi
195	Plantae	Angiospermae	Magnoliopsida	Asparagales	Orchidaceae	Dendrobium	kwangtungense			Tso, 1933	DD	China	Luding
196	Plantae	Angiospermae	Magnoliopsida	Asparagales	Orchidaceae	Dendrobium	linawianum			Rchb.f., 1861	EN	China	Tianquan, Luding, Lushui, Fugong, Gongshan, Motuo, Bomi
197	Plantae	Angiospermae	Magnoliopsida	Asparagales	Orchidaceae	Dendrobium	lituiflorum			Lindl., 1856	CR	China, India, Myanmar, Thailand, Laos	Lushui
198	Plantae	Angiospermae	Magnoliopsida	Asparagales	Orchidaceae	Dendrobium	longicornu			Lindl., 1829	EN	China, Nepal, Sikkim, Bhutan, India, Vietnam	Gongshan, Motuo
199	Plantae	Angiospermae	Magnoliopsida	Asparagales	Orchidaceae	Dendrobium	moniliforme			(L.) Sw., 1799	DD	China, India, Korea, Japan	Tianquan, Luding, Lushui, Fugong, Gongshan, Yulong, Motuo, Bomi
200	Plantae	Angiospermae	Magnoliopsida	Asparagales	Orchidaceae	Dendrobium	monticola			P.F.Hunt & Summerh., 1961	VU	China, India, Nepal, Thailand	Jilong, Nielamu
201	Plantae	Angiospermae	Magnoliopsida	Asparagales	Orchidaceae	Dendrobium	nobile			Lindl., 1830	VU	China, India, Nepal, Bhutan, Myanmar, Thailand, Laos, Vietnam	Luding, Yulong, Fugong, Gongshan, Motuo
202	Plantae	Angiospermae	Magnoliopsida	Asparagales	Orchidaceae	Dendrobium	officinale			Kimura & Migo, 1936	CR	China, Japan	Gongshan, Dingjie
203	Plantae	Angiospermae	Magnoliopsida	Asparagales	Orchidaceae	Dendrobium	salaccense			(Blume) Lindl., 1830	VU	China, Bhutan, India, Indonesia, Laos, Malaysia, Myanmar, Sri Lanka, Thailand, Vietnam	Motuo
204	Plantae	Angiospermae	Magnoliopsida	Asparagales	Orchidaceae	Dendrobium	stuposum			Lindl., 1838	VU	China, Bhutan, India, Indonesia, Malaysia, Myanmar, Philippines, Thailand	Nielamu
205	Plantae	Angiospermae	Magnoliopsida	Asparagales	Orchidaceae	Dendrobium	williamsonii			Day & Rchb.f., 1869	EN	China, India, Burma, Vietnam	Gongshan
206	Plantae	Angiospermae	Magnoliopsida	Asparagales	Orchidaceae	Gastrodia	angusta			S. Chow & S.C. Chen�� 1983	EN	China	Yulong		Endemic to Qinghai-Tibetan Plateau
207	Plantae	Angiospermae	Magnoliopsida	Asparagales	Orchidaceae	Gastrodia	elata			Blume, 1856	VU	China, Bhutan, India, Japan, Korea, Nepal, Russia	Dujiangyan, Tianquan, Wenchuan, Maoxian, Heishui, Kangding, Jiulong, Yulong, Gongshan, Lanping, Weixi, Shangri-la, Cuona, Bomi, Chayu, Linzhi, Dingjie, Wenxian, Zhouqu
208	Plantae	Angiospermae	Magnoliopsida	Asparagales	Orchidaceae	Gymnadenia	conopsea			(L.) R.Br., 1813	DD	China, Japan, Korea, Russia, Europe	Baoxing, Lixian, Maoxian, Songpan, Jinchuan, Xiaojin, Heishui, Ruodonggai, Hongyuan, Kangding, Luding, Jiulong, Daofu, Baiyu, Xiangcheng, Daocheng, Yulong, Shangri-la, Jiangda, Yadong, Milin, Chayu, Zhouqu, Diebu, Wuqia, Tashikudonggan
209	Plantae	Angiospermae	Magnoliopsida	Asparagales	Orchidaceae	Gymnadenia	orchidis			Lindl., 1835	VU	China, Bhutan, India, Pakistan	Baoxing, Wenchuan, Lixian, Maoxian, Songpan, Jinchuan, Xiaojin, Heishui, Aba, Kangding, Luding, Danba, Jiulong, Daofu, Ganzi, Dege, Xiangcheng, Daocheng, Muli, Yanyuan, Mianning, Yulong, Fugong, Gongshan, Lanping, Deqin, Weixi, Ninglang, Shangri-la, Dingri, Yadong, Jilong, Nielamu, Linzhi, Gongbujiangda, Milin, Motuo, Bomi, Chayu, Jiangda, Tongren, Maqin, Jiuzhi, Yushu, Henan, Zeku, Tongde, Guina…
210	Plantae	Angiospermae	Magnoliopsida	Asparagales	Orchidaceae	Paphiopedilum	armeniacum			S.C. Chen & F.Y. Liu, 1982	EN	China, Myanmar	Gongshan, Fugong, Lushui
211	Plantae	Angiospermae	Magnoliopsida	Asparagales	Orchidaceae	Paphiopedilum	insigne			(Wall. ex Lindl.) Pfitzer, 1888	CR	China, India	Yulong, Ninglang, Shangri-la, Weixi, Deqin
212	Plantae	Angiospermae	Magnoliopsida	Asparagales	Orchidaceae	Paphiopedilum	spicerianum			(Rchb.f.) Pfitzer, 1888	CR	China, India, Vietnam	Gongshan
213	Plantae	Angiospermae	Magnoliopsida	Asparagales	Orchidaceae	Paphiopedilum	tigrinum			Koop. & N.Haseg., 1990	EN	China, China	Lushui, Fugong
214	Plantae	Angiospermae	Magnoliopsida	Asparagales	Orchidaceae	Paphiopedilum	venustum			(Wall. ex Sims) Pfitzer, 1888	EN	China, Nepal, Bhutan, Sikkim, India, Bangladesh	Motuo, Dingjie
215	Plantae	Angiospermae	Magnoliopsida	Asparagales	Orchidaceae	Paphiopedilum	wardii			Summerh., 1932	EN	China, Myanmar	Deqin, Jiangda, Chayu
216	Plantae	Angiospermae	Magnoliopsida	Asparagales	Orchidaceae	Phalaenopsis	wilsonii			Rolfe, 1909	VU	China, India, Vietnam	Tianquan, Yulong
217	Plantae	Angiospermae	Magnoliopsida	Asparagales	Orchidaceae	Pleione	arunachalensis			Hareesh, Kumar & M.Sabu, 2017	CR	China, China	Motuo
218	Plantae	Angiospermae	Magnoliopsida	Asparagales	Orchidaceae	Pleione	bulbocodioides			(Franch.) Rolfe, 1903	DD	China, Endemic to China	Shimian, Tianquan, Maoxian, Songpan, Kangding, Luding, Jiulong, Daocheng, Muli, Yanyuan, Mianning, Gongshan, Lanping, Weixi, Shangri-la, Motuo, Mangkang, Chayu
219	Plantae	Angiospermae	Magnoliopsida	Asparagales	Orchidaceae	Pleione	formosana			Hayata, 1911	VU	China, Endemic to China	Shimian, Tianquan, Maoxian, Songpan, Kangding, Luding, Jiulong, Daocheng, Muli, Yanyuan, Mianning, Gongshan, Lanping, Weixi
220	Plantae	Angiospermae	Magnoliopsida	Asparagales	Orchidaceae	Pleione	forrestii			Schltr., 1912	EN	China, Endemic to China	Fugong
221	Plantae	Angiospermae	Magnoliopsida	Asparagales	Orchidaceae	Pleione	grandiflora			(Rolfe) Rolfe, 1903	CR	China, Vietnam	Motuo
222	Plantae	Angiospermae	Magnoliopsida	Asparagales	Orchidaceae	Pleione	hookeriana			(Lindl.) Rollisson, 1875	VU	China, Nepal, Bhutan, India, Myanmar, Laos,Thailand	Yadong, Nielamu, Motuo
223	Plantae	Angiospermae	Magnoliopsida	Asparagales	Orchidaceae	Pleione	kaatiae			P.H.Peeters, 2003	DD	China, China	Sichuanxibu
224	Plantae	Angiospermae	Magnoliopsida	Asparagales	Orchidaceae	Pleione	limprichtii			Schltr., 1922	VU	China, Myanmar	Kangding, Shangri-la
225	Plantae	Angiospermae	Magnoliopsida	Asparagales	Orchidaceae	Pleione	praecox			D. Don, 1825	VU	China, Bangladesh, Bhutan, India, Laos, Myanmar, Nepal, Thailand, Vietnam	Gongshan, Motuo
226	Plantae	Angiospermae	Magnoliopsida	Asparagales	Orchidaceae	Pleione	saxicola			Tang & F.T.Wang ex S.C.Chen, 1987	EN	China, Bhutan	Gongshan, Motuo, Bomi
227	Plantae	Angiospermae	Magnoliopsida	Asparagales	Orchidaceae	Pleione	scopulorum			W.W.Sm., 1921	VU	China, India, Myanmar	Fugong, Gongshan, Shangri-la, Weixi, Deqin, Motuo
228	Plantae	Angiospermae	Magnoliopsida	Asparagales	Orchidaceae	Pleione	yunnanensis			(Rolfe) Rolfe, 1903	VU	China, Myanmar	Shimian, Kangding, Luding, Muli, Yanyuan, Gongshan, Lanping, Weixi, Yulong, Ninglang
229	Plantae	Angiospermae	Magnoliopsida	Asparagales	Iridaceae	Iris	narcissiflora			Diels, 1924	VU	China	Ganzi, Kangding		Endemic to Qinghai-Tibetan Plateau
230	Plantae	Angiospermae	Magnoliopsida	Arecales	Arecaceae	Caryota	obtusa			Griff., 1845	VU	China, India, Laos, Myanmar, Thailand, Vietnam	Gongshan, Motuo
231	Plantae	Angiospermae	Magnoliopsida	Arecales	Arecaceae	Trachycarpus	nanus			Becc., 1910	EN	China	Yulong
232	Plantae	Angiospermae	Magnoliopsida	Poales	Poaceae	Achnatherum	breviaristatum			Keng & P.C. Kuo, 1976	VU	China	Minxian, Diebu
233	Plantae	Angiospermae	Magnoliopsida	Poales	Poaceae	Agropyron	mongolicum			Keng, 1938	LC	China	Xiningshi, Akesai, Guazhou, Luqu
234	Plantae	Angiospermae	Magnoliopsida	Poales	Poaceae	Aristida	triseta			Keng, 1941	LC	China	Aba, Rangtang, Ruodonggai, Ganzi, Kangding, Luding, Daofu, Dege, Litang, Batang, Xiangcheng, Daocheng, Derong, Lhasa, Jiangda, Dingqing, Nanmulin, Suoxian, Nima, Milin, Bomi, Chayu, Lazi, Xining, Huangyuan, Huangzhong, Datong, Ledong, Pingan, Minhe, Huzhu, Hualong, Xunhua, Qilian, HaiYan, Gangcha, Menyuan, Tongren, Jianzha, Gonghe, Guide, Tianjun, Zeku, Henan, Tongde, Guinan, Xinghai, Maqin, Mado…		Endemic to Qinghai-Tibetan Plateau
235	Plantae	Angiospermae	Magnoliopsida	Poales	Poaceae	Elymus	alashanicus			(Keng) S.L.Chen, 1994	LC	China	Sunan
236	Plantae	Angiospermae	Magnoliopsida	Poales	Poaceae	Elymus	atratus			(Nevski) Hand.-Mazz., 1936	LC	China	Rangtang, Ruodonggai, Hongyuan, Ganzi, Jiulong, Shiqu, Daocheng, Basu, Naidong, Shenzha, Pulan, Bomi, Langxian, Datong, Huzhu, Menyuan, Qilian, Xinghai, Yushu, Zadong, Qumalai, Donglan, Tianzhu, Sunan, Subei, Zhuoni		Endemic to Qinghai-Tibetan Plateau
237	Plantae	Angiospermae	Magnoliopsida	Poales	Poaceae	Elymus	brevipes			(Keng) S.L.Chen, 2006	LC	China	Baoxing, Daofu, Ganzi, Dege, Baiyu, Seda, Xiangcheng, Dangxiong, Longzi, Dingri, Andong, Zhada, Gadong, Geji, Cuoqin, Chayu, Huangyuan, Ledong, Menyuan, Qilian, Xinghai, Nangqian, Qumalai, Delingha, Tianzhu		Endemic to Qinghai-Tibetan Plateau
238	Plantae	Angiospermae	Magnoliopsida	Poales	Poaceae	Elymus	purpuraristatus			C.P. Wang & H.L. Yang, 1984	LC	China	Gonghe
239	Plantae	Angiospermae	Magnoliopsida	Poales	Poaceae	Elymus	sinosubmuticus			S.L. Chen, 2006	VU	China	Dege, Guinan
240	Plantae	Angiospermae	Magnoliopsida	Poales	Poaceae	Gaoligongshania	megalothyrsa			(Hand.-Mazz.) D.Z.Li, Hsueh & N.H.Xia, 1995	NT	China	Gongshan, Fugong, Lushui
241	Plantae	Angiospermae	Magnoliopsida	Poales	Poaceae	Kengyilia	kokonorica			(Keng) J.L.Yang, C.Yen & B.R.Baum, 1992	LC	China	Jilong, Qilian, Gonghe, Xinghai, Madong, Yushu, Zadong, Donglan, Tianzhu, Sunan, Ruoqiang, Yecheng, Cele		Endemic to Qinghai-Tibetan Plateau
242	Plantae	Angiospermae	Magnoliopsida	Poales	Poaceae	Orinus	kokonorica			(K.S.Hao) Keng, 1957	LC	China	Wenchuan, Songpan, Ganzi, Dege, Zhongba, Xining, Huangyuan, Huangzhong, Datong, Ledong, Pingan, Minhe, Huzhu, Hualong, Xunhua, Qilian, HaiYan, Gangcha, Menyuan, Tongren, Jianzha, Gonghe, Guide, Tianjun, Zeku, Henan, Tongde, Guinan, Xinghai, Maqin, Madong, Gande, Dari, Banma, Jiuzhi, Yushu, Chengdong, Nangqian, Zadong, Zhidong, Qumalai, Wuwei, Sunan		Endemic to Qinghai-Tibetan Plateau
243	Plantae	Angiospermae	Magnoliopsida	Poales	Poaceae	Sinochasea	trigyna			Keng, 1958	VU	China	Ganzi, Litang, Daocheng, Lhasa, Basu, Nanmulin, Zhongba, Nielamu, Saga, Pulan, Geji, Gaize, Cuoqin, Dangxiong, Xining, Huangyuan, Huangzhong, Datong, Ledong, Pingan, Minhe, Huzhu, Hualong, Xunhua, Qilian, HaiYan, Gangcha, Menyuan, Tongren, Jianzha, Gonghe, Guide, Tianjun, Zeku, Henan, Tongde, Guinan, Xinghai, Maqin, Madong, Gande, Dari, Banma, Jiuzhi, Yushu, Chengdong, Nangqian, Zadong, Zhidong, …
244	Plantae	Angiospermae	Magnoliopsida	Poales	Poaceae	Hordeum	innermongolicum			P.C. Kuo & L.B. Cai, 1987	VU	China	Tongde, Menyuan
245	Plantae	Angiospermae	Magnoliopsida	Ranunculales	Papaveraceae	Meconopsis	barbiseta			C.Y.Wu & H.Chuang ex L.H.Zhou, 1979	EN	China	Ganzi, Aba, Jiuzhi, Banma		Endemic to Qinghai-Tibetan Plateau
246	Plantae	Angiospermae	Magnoliopsida	Ranunculales	Papaveraceae	Meconopsis	punicea			Maxim., 1889	LC	China	Aba, Lixian, Songpan, Jinchuan, Xiaojin, Heishui, Madongkang, Rangtang, Ruodonggai, Hongyuan, Ganzi, Kangding, Daofu, Dege, Shiqu, Seda, Changdong, Leiwuqi, Jiangda, Xunhua, Menyuan, Tongren, Gonghe, Zeku, Henan, Tongde, Guinan, Xinghai, Maqin, Madong, Gande, Dari, Banma, Jiuzhi, Yushu, Chengdong, Nangqian, Zadong, Zhidong, Qumalai, Kangle, Lintan, Diebu, Xiahe		Endemic to Qinghai-Tibetan Plateau
247	Plantae	Angiospermae	Magnoliopsida	Ranunculales	Papaveraceae	Meconopsis	torquata			Prain, 1906	NT	China	Lhasa, Nielamu, Milin		Endemic to Qinghai-Tibetan Plateau
248	Plantae	Angiospermae	Magnoliopsida	Ranunculales	Papaveraceae	Corydalis	saxicola			G.S.Bunting, 1966	LC	China	Daocheng
249	Plantae	Angiospermae	Magnoliopsida	Ranunculales	Berberidaceae	Dysosma	aurantiocaulis			(Hand.-Mazz.) Hu, 1937	VU	China, Myanmar	Gongshan, Weixi
250	Plantae	Angiospermae	Magnoliopsida	Ranunculales	Berberidaceae	Dysosma	delavayi			(Franch.) Hu, 1937	DD	China	Shimian, Tianquan, Maoxian, Kangding, Luding, Weixi
251	Plantae	Angiospermae	Magnoliopsida	Ranunculales	Berberidaceae	Dysosma	tsayuensis			T.S. Ying, 1979	VU	China	Linzhi, Bomi, Milin, Motuo, Chayu		Endemic to Qinghai-Tibetan Plateau
252	Plantae	Angiospermae	Magnoliopsida	Ranunculales	Berberidaceae	Dysosma	versipellis			(Hance) M.Cheng ex T.S.Ying, 1979	VU	China	Shimian, Jiulong
253	Plantae	Angiospermae	Magnoliopsida	Ranunculales	Berberidaceae	Sinopodophyllum	hexandrum			(Royle) T.S.Ying, 1985	LC	China, Afghanistan, Bhutan, India, Nepal, Pakistan	Wenchuan, Lixian, Maoxian, Songpan, Jinchuan, Xiaojin, Heishui, Madongkang, Rangtang, Aba, Hongyuan, Kangding, Jiulong, Yajiang, Daofu, Batang, Xiangcheng, Daocheng, Derong, Muli, Yulong, Shangri-la, Deqin, Weixi, Changdong, Jiangda, Dingqing, Chaya, Basu, Mangkang, Bianba, Longzi, Dingjie, Yadong, Jilong, Suoxian, Linzhi, Milin, Bomi, Chayu, Xining, Huangyuan, Huangzhong, Datong, Ledong, Pingan,…
254	Plantae	Angiospermae	Magnoliopsida	Ranunculales	Circaeasteraceae	Kingdonia	uniflora			Balf.f. & W.W.Sm., 1914	VU	China	Lixian, Maoxian, Songpan, Jiuzhaigou, Jinchuan, Madongkang, Luding, Deqin, Wenxian, Tanchang, Zhouqu, Diebu
255	Plantae	Angiospermae	Magnoliopsida	Ranunculales	Ranunculaceae	Coptis	chinensis			Franch., 1897	VU	China	Dujiangyan, Luqu
256	Plantae	Angiospermae	Magnoliopsida	Ranunculales	Ranunculaceae	Coptis	teeta			Wall., 1842	EN	China	Lushui, Fugong, Gongshan, Motuo, Chayu		Endemic to Qinghai-Tibetan Plateau
257	Plantae	Angiospermae	Magnoliopsida	Proteales	Nelumbonaceae	Nelumbo	nucifera			Gaertn., 1788	DD	China, Bhutan, India, Indonesia, Japan, Korea, Malaysia, Myanmar, Nepal, New Guinea, Pakistan, Philippines, Russia, Sri Lanka, Thailand, Vietnam, Australia	Yulong, Ninglang, Jianchuan, Yunlong, Lushui, Lanping, Fugong, Gongshan, Shangri-la, Weixi, Deqin
258	Plantae	Angiospermae	Magnoliopsida	Trochodendrales	Trochodendraceae	Tetracentron	sinense			Oliv., 1889	LC	China, Bhutan, India, Myanmar, Nepal, Vietnam	Dujiangyan, Tianquan, Baoxing, Wenchuan, Lixian, Kangding, Luding, Litang, Mianning, Yulong, Gongshan, Deqin, Weixi, Ninglang, Motuo, Bomi, Chayu, Dingjie, Wenxian, Zhouqu, Diebu
259	Plantae	Angiospermae	Magnoliopsida	Saxifragales	Paeoniaceae	Paeonia	delavayi			Franch., 1887	LC	China	Tianquan, Baoxing, Kangding, Jiulong, Yajiang, Daofu, Litang, Batang, Xiangcheng, Daocheng, Derong, Muli, Yanyuan, Yulong, Ninglang, Gongshan, Lanping, Shangri-la, Deqin, Weixi, Jianchuan, Linzhi, Bomi, Chayu, Zhanang		Endemic to Qinghai-Tibetan Plateau
260	Plantae	Angiospermae	Magnoliopsida	Saxifragales	Paeoniaceae	Paeonia	decomposita			Hand.-Mazz., 1939	EN	China	Jinchuan, Madongkang		Endemic to Qinghai-Tibetan Plateau
261	Plantae	Angiospermae	Magnoliopsida	Saxifragales	Paeoniaceae	Paeonia	ludlowii			(Stern & G.Taylor) D.Y.Hong, 1997	EN	China	Longzi, Linzhi, Milin		Endemic to Qinghai-Tibetan Plateau
262	Plantae	Angiospermae	Magnoliopsida	Saxifragales	Paeoniaceae	Paeonia	rockii			(S.G.Haw & Lauener) T.Hong & J.J.Li, 1992	VU	China	Wenxian, Zhouqu
263	Plantae	Angiospermae	Magnoliopsida	Saxifragales	Paeoniaceae	Paeonia	rockii	linyanshanii		T. Hong & G.L. Osti, 1994	DD	China	Wenxian
264	Plantae	Angiospermae	Magnoliopsida	Saxifragales	Paeoniaceae	Paeonia	rotundiloba			D. Y. Hong, 2011	EN	China	Heishui, Lixian, Maoxian, Songpan, Wenchuan
265	Plantae	Angiospermae	Magnoliopsida	Saxifragales	Paeoniaceae	Paeonia	sterniana			H.R.Fletcher, 1959	LC	China	Bomi, Chayu
266	Plantae	Angiospermae	Magnoliopsida	Saxifragales	Cercidiphyllaceae	Cercidiphyllum	japonicum			Siebold & Zucc., 1846	LC	China, Japan	Dujiangyan, Shimian, Tianquan, Baoxing, Songpan, Xiaojin, Aba, Luding, Jiulong, Zhouqu, Diebu
267	Plantae	Angiospermae	Magnoliopsida	Saxifragales	Crassulaceae	Rhodiola	crenulata			(Hook.f. & Thomson) H.Ohba, 1976	EN	China, Bhutan, Nepal, India	Jinchuan, Madongkang, Hongyuan, Kangding, Luding, Jiulong, Yajiang, Daofu, Dege, Baiyu, Seda, Xiangcheng, Daocheng, Muli, Yulong, Deqin, Shangri-la, Ninglang, Lhasa, Zuogong, Mangkang, Longzi, Nanmulin, Dingri, Lazi, Dingjie, Zhongba, Yadong, Nielamu, Jiali, Shenzha, Baqing, Pulan, Linzhi, Bomi, Chayu, Langxian, Zeku, Henan, Tongde, Guinan, Xinghai, Maqin, Madong, Gande, Dari, Banma, Jiuzhi, Yush…
268	Plantae	Angiospermae	Magnoliopsida	Saxifragales	Crassulaceae	Rhodiola	fastigiata			(Hook.f. & Thomson) Fu, 1965	LC	China, Bhutan, India, Kashmir, Nepal	Tianquan, Baoxing, Wenchuan, Songpan, Jinchuan, Xiaojin, Heishui, Madongkang, Ganzi, Kangding, Luding, Jiulong, Yajiang, Daofu, Litang, Xiangcheng, Daocheng, Muli, Yanyuan, Puge, Mianning, Yulong, Gongshan, Deqin, Weixi, Lushui, Shangri-la, Lhasa, Basu, Jiacha, Cuona, Dingri, Zhongba, Nielamu, Suoxian, Pulan, Ritu, Gaize, Linzhi, Milin, Motuo, Bomi, Chayu, Langxian, Biru, Menyuan, Banma, Xiahe
269	Plantae	Angiospermae	Magnoliopsida	Saxifragales	Crassulaceae	Rhodiola	himalensis			(D.Don) Fu, 1965	LC	China, Bhutan, Nepal, India	Jinchuan, Madongkang, Kangding, Dege, Xiangcheng, Daocheng, Deqin, Linzhou, Cuona, Dingri, Dingjie, Yadong, Jilong, Nielamu, Pulan, Motuo, Linzhou, Gonghe, Tongde, Qumalai, Zadong, Nangqian, Yushu, Chengdong, Jiuzhi, Maqin, Jianzha, Tongren, Henan, Huangzhong, Datong, Huzhu, Qilian, Menyuan
270	Plantae	Angiospermae	Magnoliopsida	Saxifragales	Crassulaceae	Rhodiola	quadrifida			Fisch. & C.A.Mey., 1841	LC	China, Kazakhstan, Mongolia, Russia	Kangding, Yajiang, Litang, Muli, Lhasa, Dangxiong, Dazi, Changdong, Dingqing, Zuogong, Mangkang, Naidong, Dingri, Lazi, Dingjie, Zhongba, Yadong, Jilong, Nielamu, Biru, Andong, Shenzha, Bange, Pulan, Zhada, Gadong, Gaize, Dingjie, Lazi, Dangxiong, Shuanghu, Datong, Tongren, Tongde, Guide, Banma, Zadong, Zhidong, Qumalai, Nangqian, Yushu, Chengdong, Madong, Jiuzhi, Maqin, Jianzha, Zeku, Henan, Ged…
271	Plantae	Angiospermae	Magnoliopsida	Saxifragales	Crassulaceae	Rhodiola	rosea			L., 1753	VU	China, Japan, Kazakhstan, Korea, Mongolia, Russia; Europe, North America	Tashikudonggan
272	Plantae	Angiospermae	Magnoliopsida	Saxifragales	Crassulaceae	Rhodiola	sacra			(Raym.-Hamet) Fu, 1965	VU	China	Litang, Batang, Deqin, Shangri-la, Lhasa, Linzhou, Gongjue, Mangkang, Cuomei, Longzi, Rikaze, Nanmulin, Dingri, Lazi, Angren, Nielamu, Saga, Linzhi, Langxian, Naidong, Milin, Nangqian
273	Plantae	Angiospermae	Magnoliopsida	Saxifragales	Crassulaceae	Rhodiola	tangutica			(Maxim.) S.H.Fu, 1986	VU	China	Songpan, Kangding, Luding, Dege, Zhongba, Yadong, Saga, Pulan, Ritu, Gaize, Shuanghu, Bange, Zeku, Henan, Tongde, Guinan, Xinghai, Maqin, Madong, Gande, Dari, Banma, Jiuzhi, Yushu, Chengdong, Nangqian, Zadong, Zhidong, Qumalai, Xining, Huangyuan, Huangzhong, Datong, Ledong, Pingan, Minhe, Huzhu, Hualong, Xunhua, Qilian, HaiYan, Gangcha, Menyuan, Tongren, Jianzha, Gonghe, Guide, Tianjun, Delingha,…		Endemic to Qinghai-Tibetan Plateau
274	Plantae	Angiospermae	Magnoliopsida	Saxifragales	Crassulaceae	Rhodiola	wallichiana			(Hook.) Fu, 1965	LC	China, Bhutan, India, Myanmar, Nepal	Tianquan, Kangding, Jiulong, Daofu, Ganzi, Dege, Yulong, Gongshan, Deqin, Yadong, Nielamu, Linzhi, Motuo, Bomi, Maqin, Yushu, Nangqian
275	Plantae	Angiospermae	Magnoliopsida	Saxifragales	Crassulaceae	Rhodiola	yunnanensis			(Franch.) Fu, 1965	LC	China	Shimian, Tianquan, Baoxing, Wenchuan, Li, Mao, Songpan, Jinchuan, Xiaojin, Heishui, Madongkang, Rangtang, Kangding, Luding, Jiulong, Yajiang, Daofu, Daocheng, Derong, Muli, Yanyuan, Mianning, Yulong, Ninglang, Jianchuan, Yunlong, Shangri-la, Weixi, Deqin, Cuona, Yadong, Nielamu, Jiali, Linzhi, Bomi, Chayu, Wenxian, Tanchang, Kangxian, Diebu
276	Plantae	Angiospermae	Magnoliopsida	Saxifragales	Cynomoriaceae	Cynomorium	songaricum			Rupr., 1869	VU	China, Afghanistan, Mongolia, Iran	Gedongmu, Delingha, Wulan, Donglan, Guazhou, Ruoqiang, Shache, Yecheng, Hetian, Wuqia
277	Plantae	Angiospermae	Magnoliopsida	Fabales	Fabaceae	Glycine	soja			Siebold & Zucc., 1845	LC	China, Afghanistan, Japan, Korea, Russia	Lushan, Baoxing, Yulong, Ninglang, Jianchuan, Yunlong, Lushui, Lanping, Fugong, Gongshan, Shangri-la, Weixi, Deqin, Wenxian
278	Plantae	Angiospermae	Magnoliopsida	Fabales	Fabaceae	Glycyrrhiza	inflata			Batalin, 1891	LC	China, Kazakhstan, Kyrgyzstan, Mongolia, Tajikistan, Turkmenistan, Uzbekistan	Guazhou, Yutian, Minfeng, Hetian, Shache, Ruoqiang, Qiemo, Cele, Moyu
279	Plantae	Angiospermae	Magnoliopsida	Fabales	Fabaceae	Glycyrrhiza	uralensis			Fisch. ex DC., 1825	LC	China, Mongolia, Russia	Xining, Huangyuan, Huangzhong, Datong, Ledong, Pingan, Minhe, Huzhu, Hualong, Xunhua, Qilian, HaiYan, Gangcha, Menyuan, Tongren, Jianzha, Gonghe, Guide, Tianjun, Delingha, Gedongmu, Mangya, Donglan, Wulan, Guinan, Yumen, Hetian, Minfeng, Wuqia, Aketao
280	Plantae	Angiospermae	Magnoliopsida	Fabales	Fabaceae	Ormosia	henryi			Prain, 1900	VU	China, Vietnam,Thailand	Kangding
281	Plantae	Angiospermae	Magnoliopsida	Fabales	Fabaceae	Ormosia	hosiei			Hemsl. & E.H.Wilson, 1906	EN	China	Jiulong, Wenxian
282	Plantae	Angiospermae	Magnoliopsida	Fabales	Fabaceae	Salweenia	bouffordiana			H.Sun, Zhi M.Li & J.P.Yue, 2011	EN	China	Ganzi		Endemic to Qinghai-Tibetan Plateau
283	Plantae	Angiospermae	Magnoliopsida	Fabales	Fabaceae	Salweenia	wardii			Baker f., 1935	EN	China	Changdong, Basu		Endemic to Qinghai-Tibetan Plateau
284	Plantae	Angiospermae	Magnoliopsida	Rosales	Rosaceae	Malus	rockii			Rehder, 1933	LC	China, Bhutan	Jinchuan, Heishui, Kangding, Jiulong, Luhuo, Litang, Mianning, Yulong, Lushui, Gongshan, Shangri-la, Weixi, Deqin, Lhasa, Longzi, Rikaze, Yadong, Jilong, Linzhi, Gongbujiangda, Milin, Motuo, Bomi, Chayu, Langxian
285	Plantae	Angiospermae	Magnoliopsida	Rosales	Rosaceae	Malus	sieversii			M.Roem., 1847	VU	China, Kazakhstan, Russia	Ruoqiang, Yutian
286	Plantae	Angiospermae	Magnoliopsida	Rosales	Rosaceae	Malus	sikkimensis			(Wenz.) Koehne ex C.K.Schneid., 1906	DD	China, Bhutan, India, Nepal	Deqin, Weixi, Yulong, Cuona, Dingjie, Yadong, Jilong, Linzhi, Milin, Motuo, Bomi, Chayu
287	Plantae	Angiospermae	Magnoliopsida	Rosales	Rosaceae	Prunus	kansuensis			Rehder, 1922	DD	China	Jiuzhaigou, Heishui, Madongkang, Kangding, Muli, Xunhua, Minhe, Zhouqu, Xiahe, Wenxian, Tanchang
288	Plantae	Angiospermae	Magnoliopsida	Rosales	Rosaceae	Prunus	mira			Koehne, 1912	DD	China	Songpan, Jinchuan, Heishui, Madongkang, Hongyuan, Jiulong, Yajiang, Daofu, Batang, Xiangcheng, Daocheng, Muli, Yanyuan, Ninglang, Shangri-la, Weixi, Yulong, Fugong, Lhasa, Qushui, Changdong, Basu, Mangkang, Qiongjie, Luozha, Jiacha, Longzi, Cuona, Rikaze, Yadong, Jilong, Nielamu, Linzhi, Gongbujiangda, Milin, Bomi, Chayu, Jiangda		Endemic to Qinghai-Tibetan Plateau
289	Plantae	Angiospermae	Magnoliopsida	Rosales	Rosaceae	Prunus	mongolica			Maxim., 1879	VU	China, Mongolia	Subei, Sunan
290	Plantae	Angiospermae	Magnoliopsida	Rosales	Rosaceae	Prunus	tenella			Batsch, 1801	EN	Europe, West and Central Asia	Zhuoni, Sunan, Shache, Yutian
291	Plantae	Angiospermae	Magnoliopsida	Rosales	Rosaceae	Rosa	chinensis		spontanea	(Rehder & E.H.Wilson) T.T.Yu & T.C.Ku, 1985	EN	China	Wenxian
292	Plantae	Angiospermae	Magnoliopsida	Rosales	Rosaceae	Rosa	lucidissima			H.L��v., 1911	CR	China	Tianquan, Lushan, Baoxing, Wenchuan, Maoxian, Songpan, Jiulong, Wenxian
293	Plantae	Angiospermae	Magnoliopsida	Rosales	Rosaceae	Rosa	odorata		gigantea	(Cr��p.) Rehder & E.H. Wilson, 1915	DD	China, Myanmar, Thailand, Vietnam	Weixi, Yulong
294	Plantae	Angiospermae	Magnoliopsida	Rosales	Rosaceae	Rosa	praelucens			Bijh., 1929	CR	China	Jiulong, Shangri-la
295	Plantae	Angiospermae	Magnoliopsida	Rosales	Rhamnaceae	Berchemiella	wilsonii			(C.K.Schneid.) Nakai, 1923	LC	China	Diebu
296	Plantae	Angiospermae	Magnoliopsida	Rosales	Ulmaceae	Zelkova	schneideriana			Hand.-Mazz., 1929	VU	China	Deqin, Chayu
297	Plantae	Angiospermae	Magnoliopsida	Rosales	Moraceae	Morus	macroura			Miq., 1851	LC	China, Bhutan, Indochina, Malaysia, Myanmar, India, Thailand	Wenchuan, Motuo, Bomi
298	Plantae	Angiospermae	Magnoliopsida	Rosales	Moraceae	Morus	notabilis			C.K.Schneid., 1916	LC	China	Muli, Lushui, Fugong, Gongshan, Deqin
299	Plantae	Angiospermae	Magnoliopsida	Fagales	Fagaceae	Quercus	oxyphylla			Hand.-Mazz., 1929	NT	China	Daocheng, Wenxian
300	Plantae	Angiospermae	Magnoliopsida	Malpighiales	Rafflesiaceae	Sapria	himalayana			Griffi., 1844	VU	China, India, Myanmar, Thailand, Vietnam	Chayuxian
301	Plantae	Angiospermae	Magnoliopsida	Myrtales	Combretaceae	Terminalia	myriocarpa			Van Heurck & M��ll.Arg., 1871	VU	China, Bangladesh, Bhutan, India, Indonesia, Laos, Malaysia, Myanmar, Nepal, Thailand, Vietnam	Jianchuan, Yunlong, Lushui, Lanping, Fugong, Gongshan, Weixi, Motuo
302	Plantae	Angiospermae	Magnoliopsida	Myrtales	Lythraceae	Lagerstroemia	minuticarpa			Debberm. ex P.C.Kanjilal, 1934	EN	China, India, Bhutan	Gongshan, Motuo
303	Plantae	Angiospermae	Magnoliopsida	Sapindales	Sapindaceae	Trapa	incisa			Sieb. et Zucc.., 1845	DD	China, Japan, Vietnam, Thailand, Laos, Malaysia, Indonesia	Yulong
304	Plantae	Angiospermae	Magnoliopsida	Sapindales	Sapindaceae	Acer	amplum	catalpifolium		(Rehder) Y.S.Chen, 2008	VU	China	Shimian, Tianquan, Lixian, Maoxian, Kangding
305	Plantae	Angiospermae	Magnoliopsida	Sapindales	Sapindaceae	Acer	pentaphyllum			Diels, 1931	CR	China	Kangding, Jiulong, Yajiang, Muli		Endemic to Qinghai-Tibetan Plateau
306	Plantae	Angiospermae	Magnoliopsida	Sapindales	Sapindaceae	Eurycorymbus	cavaleriei			(H.L��v.) Rehder & Hand.-Mazz., 1934	NT	China	Gongshan
307	Plantae	Angiospermae	Magnoliopsida	Sapindales	Sapindaceae	Handeliodendron	bodinieri			(H.L��v.) Rehder, 1935	EN	China	Kangding
308	Plantae	Angiospermae	Magnoliopsida	Sapindales	Rutaceae	Citrus	cavaleriei			H.L��v. ex Cavalerie, 1911	DD	China	Dayi, Maoxian, Wenxian
309	Plantae	Angiospermae	Magnoliopsida	Sapindales	Rutaceae	Phellodendron	chinense			C.K.Schneid., 1907	LC	China	Shangri-la, Yulong, Weixi
310	Plantae	Angiospermae	Magnoliopsida	Sapindales	Meliaceae	Aglaia	lawii			(Wight) C.J.Saldanha, 1976	LC	China, Indonesia, Laos, Malaysia, Thailand, Vietnam	Motuo
311	Plantae	Angiospermae	Magnoliopsida	Sapindales	Meliaceae	Toona	ciliata			M.Roem., 1846	LC	China, Bangladesh, Bhutan, Cambodia, India, Indonesia, Laos, Malaysia, Myanmar, Nepal, Pakistan, Papua New Guinea, Philippines, Sri Lanka, Thailand, Vietnam; Australia	Lushui, Yulong, Chayu
312	Plantae	Angiospermae	Magnoliopsida	Malvales	Malvaceae	Paradombeya	sinensis			Dunn, 1902	EN	China	Yulong, Ninglang, Jianchuan, Yunlong, Lushui, Lanping, Fugong, Gongshan, Shangri-la, Weixi, Deqin
313	Plantae	Angiospermae	Magnoliopsida	Malvales	Dipterocarpaceae	Hopea	shingkeng			(Dunn) Bor, 1941	EN	China	Chayu
314	Plantae	Angiospermae	Magnoliopsida	Malvales	Malvaceae	Firmiana	major			(W. W. Smith) Hand.-Mazz., 1878	EN	China	Shangri-la, Yulong, Jianchuan, Yunlong
315	Plantae	Angiospermae	Magnoliopsida	Caryophyllales	Polygonaceae	Fagopyrum	dibotrys			(D.Don) H.Hara, 1966	LC	China, Bhutan, India, Kashmir, Myanmar, Nepal, Vietnam	Muli, Batang, Kangding, Hongyuan, Ruodonggai, Baoxing, Tianquan, Dujiangyan, Lushui, Fugong, Gongshan, Lanping, Shangri-la, Deqin, Weixi, Yulong, Basu, Cuona, Yadong, Nielamu, Linzhi, Milin, Motuo, Bomi, Chayu
316	Plantae	Angiospermae	Magnoliopsida	Caryophyllales	Caryophyllaceae	Psammosilene	tunicoides			W.C. Wu & C.Y. Wu, 1945	EN	China	Batang, Xiangcheng, Daocheng, Muli, Weixi, Yulong, Shangri-la, Deqin, Linzhi, Chayu
317	Plantae	Angiospermae	Magnoliopsida	Ericales	Styracaceae	Sinojackia	henryi			(D��mmer) Merr., 1937	DD	China	Kangding
318	Plantae	Angiospermae	Magnoliopsida	Caryophyllales	Amaranthaceae	Baolia	bracteata			H.W. Kung & G.L. Chu, 1978	LC	China	Diebu		Endemic to Qinghai-Tibetan Plateau
319	Plantae	Angiospermae	Magnoliopsida	Cornales	Nyssaceae	Davidia	involucrata			Baillon, 1871	LC	China	Baoxing, Tianquan, Pingwu, Wenxian
320	Plantae	Angiospermae	Magnoliopsida	Ericales	Primulaceae	Pomatosace	filicula			Maxim., 1881	LC	China	Songpan, Ruodonggai, Hongyuan, Dege, Shiqu, Biru, Andong, Shenzha, Zeku, Henan, Tongde, Guinan, Xinghai, Maqin, Madong, Gande, Dari, Banma, Jiuzhi, Yushu, Chengdong, Nangqian, Zadong, Zhidong, Qumalai, Xining, Huangyuan, Huangzhong, Datong, Ledong, Pingan, Minhe, Huzhu, Hualong, Xunhua, Qilian, HaiYan, Gangcha, Menyuan, Tongren, Jianzha, Gonghe, Guide, Tianjun, Delingha, Gedongmu, Mangya, Donglan…		Endemic to Qinghai-Tibetan Plateau
321	Plantae	Angiospermae	Magnoliopsida	Ericales	Theaceae	Camellia	sinensis			(L.) Kuntze, 1887	DD	China, India, Japan, Korea	Dujiangyan, Pingwu, Shimian, Tianquan, Wenchuan, Songpan, Kangding, Luding, Jiulong, Muli, Gongshan, Linzhi, Motuo, Bomi, Chayu, Wenxian, Kangxian
322	Plantae	Angiospermae	Magnoliopsida	Ericales	Theaceae	Camellia	sinensis		assamica	(J.W.Mast.) Kitam., 1950	VU	China, Laos, Myanmar, Thailand, Vietnam	Gongshan
323	Plantae	Angiospermae	Magnoliopsida	Ericales	Actinidiaceae	Actinidia	arguta			Miq., 1867	LC	China, Japan, Korea	Dujiangyan, Shimian, Tianquan, Baoxing, Kangding, Mianning, Gongshan, Lanping, Deqin, Weixi, Yulong, Wenxian
324	Plantae	Angiospermae	Magnoliopsida	Ericales	Actinidiaceae	Actinidia	chinensis			Planch., 1847	LC	China	Tianquan, Shimian, Songpan, Wenchuan, Baoxing, Pingwu, Wenxian
325	Plantae	Angiospermae	Magnoliopsida	Ericales	Ericaceae	Rhododendron	dauricum			L., 1753	LC	China, Japan, Korea, Mongolia, Russia	Zhuoni
326	Plantae	Angiospermae	Magnoliopsida	Ericales	Ericaceae	Rhododendron	williamsianum			Rehder & E.H.Wilson, 1913	EN	China	Madongkang, Aba, Kangding, Motuo
327	Plantae	Angiospermae	Magnoliopsida	Gentianales	Rubiaceae	Emmenopterys	henryi			Oliv., 1889	NT	China	Shimian, Tianquan, Baoxing, Songpan, Jiulong, Yanyuan, Pingwu, Wenxian
328	Plantae	Angiospermae	Magnoliopsida	Gentianales	Rubiaceae	Neonauclea	tsaiana			S.Q. Zou, 1988	EN	China	Motuo
329	Plantae	Angiospermae	Magnoliopsida	Gentianales	Gentianaceae	Lomatogoniopsis	alpina			T.N. Ho & S.W. Liu, 1980	EN	China	Jiangda, Leiwuqi, Dari, Jiuzhi, Yushu, Zadong		Endemic to Qinghai-Tibetan Plateau
330	Plantae	Angiospermae	Magnoliopsida	Gentianales	Apocynaceae	Merrillanthus	hainanensis			Chun & Tsiang, 1941	EN	China, Cambodia	Gongshan, Deqin, Motuo
331	Plantae	Angiospermae	Magnoliopsida	Boraginales	Boraginaceae	Arnebia	euchroma			(Royle ex Benth.) I.M.Johnst., 1924	EN	China, Afghanistan, India, Kazakhstan, Kyrgyzstan, Nepal, Pakistan, Russia, Tajikistan, Turkmenistan, Uzbekistan	Zhanang, Jilong, Nielamu, Pulan, Zhada, Ritu, Hetian, Tashikudonggan, Aketao
332	Plantae	Angiospermae	Magnoliopsida	Solanales	Solanaceae	Lycium	ruthenicum			Murray, 1780	LC	China, Afghanistan, Kazakhstan, Kyrgyzstan, Mongolia, Pakistan, Russia, Tajikistan, Turkmenistan, Uzbekistan, Georgia,Turkey, Azerbaijan	Gedongmu, Delingha, Donglan, Wulan, Wenxian, Lintan, Jishishan, Akesai, Minle, Sunan, Wuwei, Minfeng, Yutian, Luopu, Pishan, Moyu, Hetian, Tashikudonggan, Shache, Qiemo, Ruoqiang
333	Plantae	Angiospermae	Magnoliopsida	Lamiales	Oleaceae	Fraxinus	mandshurica			Rupr., 1857	VU	China, Japan, Korea, Russia	Wenxian
334	Plantae	Angiospermae	Magnoliopsida	Lamiales	Oleaceae	Fraxinus	sogdiana			Bunge, 1852	LC	China, Kazakhstan, Kyrgyzstan, Tajikistan, Uzbekistan	Tashikudonggan, Shache, Hetian
335	Plantae	Angiospermae	Magnoliopsida	Lamiales	Plantaginaceae	Neopicrorhiza	scrophulariiflora			(Pennell) D.Y.Hong, 1984	EN	China, Nepal	Weixi, Gongshan, Deqin, Nielamu, Bomi, Yadong, Cuona
336	Plantae	Angiospermae	Magnoliopsida	Lamiales	Scrophulariaceae	Scrophularia	stylosa			P.C. Tsoong, 1994	VU	China	Wenxian
337	Plantae	Angiospermae	Magnoliopsida	Lamiales	Orobanchaceae	Cistanche	deserticola			Ma, 1960	EN	China, Mongolia	Subei
338	Plantae	Angiospermae	Magnoliopsida	Asterales	Asteraceae	Leucomeris	decora			Kurz, 1872	DD	China, Vietnam, Thailand, Myanmar	Jiulong
339	Plantae	Angiospermae	Magnoliopsida	Asterales	Asteraceae	Saussurea	balangshanensis			Ya Z. Zhang & H. Sun, 2019	DD	China	Xiaojin		Endemic to Qinghai-Tibetan Plateau
340	Plantae	Angiospermae	Magnoliopsida	Asterales	Asteraceae	Saussurea	gossipiphora			D. Don, 1821	LC	China, India, Pakistan, Nepal, Bhutan	Deqin, Yulong, Nielamu, Yadong, Cuona, Pulan
341	Plantae	Angiospermae	Magnoliopsida	Asterales	Asteraceae	Saussurea	laniceps			Hand.-Mazz., 1937	DD	China	Dege, Xiangcheng, Daocheng, Gongshan, Deqin, Shangri-la, Yulong, Changdong, Leiwuqi, Naidong, Cuona, Yadong, Nielamu, Milin, Chayu, Tashikudonggan		Endemic to Qinghai-Tibetan Plateau
342	Plantae	Angiospermae	Magnoliopsida	Asterales	Asteraceae	Saussurea	medusa			Maxim., 1881	DD	China, India, Pakistan	Maoxian, Songpan, Ganzi, Kangding, Jiulong, Daofu, Shiqu, Seda, Xiangcheng, Daocheng, Deqin, Shangri-la, Linzhou, Changdong, Jiangda, Dingqing, Basu, Zuogong, Zhongba, Andong, Shenzha, Suoxian, Bange, Pulan, Zhada, Ritu, Gaize, Naidong, Longzi, Suoxian, Shuanghu, Zeku, Henan, Tongde, Guinan, Xinghai, Maqin, Madong, Gande, Dari, Banma, Jiuzhi, Yushu, Chengdong, Nangqian, Zadong, Zhidong, Qumalai, …
343	Plantae	Angiospermae	Magnoliopsida	Dipsacales	Caprifoliaceae	Nardostachys	jatamansi			(Jones) DC., 1830	CR	China, India, Nepal, Bhutan	Songpan, Madongkang, Aba, Ruodonggai, Hongyuan, Ganzi, Kangding, Jiulong, Yajiang, Daofu, Xinlong, Dege, Seda, Litang, Batang, Xiangcheng, Daocheng, Derong, Muli, Yanyuan, Fugong, Deqin, Weixi, Shangri-la, Yulong, Lhasa, Linzhou, Jiangda, Gongjue, Leiwuqi, Zuogong, Mangkang, Jiacha, Longzi, Cuona, Nanmulin, Dingjie, Zhongba, Yadong, Jilong, Nielamu, Pulan, Linzhi, Langxian, Dingri, Angren, Saga, …
344	Plantae	Angiospermae	Magnoliopsida	Apiales	Araliaceae	Panax	bipinnatifidus			Seem.,1868	VU	China, India, Nepal, Vietnam	Shimian, Baoxing, Wenchuan, Lixian, Maoxian, Jinchuan, Xiaojin, Heishui, Madongkang, Ruodonggai, Kangding, Jiulong, Xiangcheng, Daocheng, Muli, Mianning, Pingwu, Gongshan, Deqin, Weixi, Yulong, Shangri-la, Cuona, Yadong, Jilong, Nielamu, Linzhi, Gongbujiangda, Milin, Motuo, Bomi, Chayu, Mangkang, Longzi, Dingjie, Xunhua, Huzhu, Banma, Kangle, Zhouqu
345	Plantae	Angiospermae	Magnoliopsida	Apiales	Araliaceae	Panax	bipinnatifidus		angustifolius	(Burkill) J.Wen, 2001	DD	China, Bhutan, India, Nepal, Thailand	Tianquan
346	Plantae	Angiospermae	Magnoliopsida	Apiales	Araliaceae	Panax	pseudo-ginseng			C.A.Mey., 1842	LC	China	Nielamu, Jilong, Dingjie, Motuo, Linzhi		Endemic to Qinghai-Tibetan Plateau
347	Plantae	Angiospermae	Magnoliopsida	Apiales	Araliaceae	Panax	stipuleanatus			Tsai & K.M. Feng, 1975	EN	China, Vietnam	Motuo
348	Plantae	Angiospermae	Magnoliopsida	Apiales	Araliaceae	Panax	vietnamensis			Ha & Grushvitzky, 1985	DD	China, Vietnam	Tianquan, Fugong, Nielamu
349	Plantae	Angiospermae	Magnoliopsida	Apiales	Araliaceae	Panax	wangianum			S.C. Sun, 1946	DD	China	Aba, Tianquan, Heishui, Shimian, Dujiangyan, Baoxing, Maoxian, Wenchuan, Lixian, Pingwu, Songpan, Fugong, Gongshan, Deqin, Longzi, Cuona, Milin, Bomi, Nielamu
350	Plantae	Angiospermae	Magnoliopsida	Apiales	Apiaceae	Chuanminshen	violaceum			M.L. Sheh & R.H. Shan, 1980	EN	China	Pingwu
